# Supplementary material for: Establishing an immune correlate of protection for Nipah virus in nonhuman primates
Source: PubMed Central journal article supplement — NPJ Vaccines. 2024 Dec 19;9:244. doi: 10.1038/s41541-024-01036-2 (PMC11659318; doi:10.1038/s41541-024-01036-2), 2024-12-19
Supplement: 41541_2024_1036_MOESM1_ESM.pdf [file 41541_2024_1036_MOESM1_ESM.pdf]

**Supplementary Figure 1:** Anti-Nipah virus total IgG and neutralizing antibody titers at Study Days 0, 14 and 21

**A**

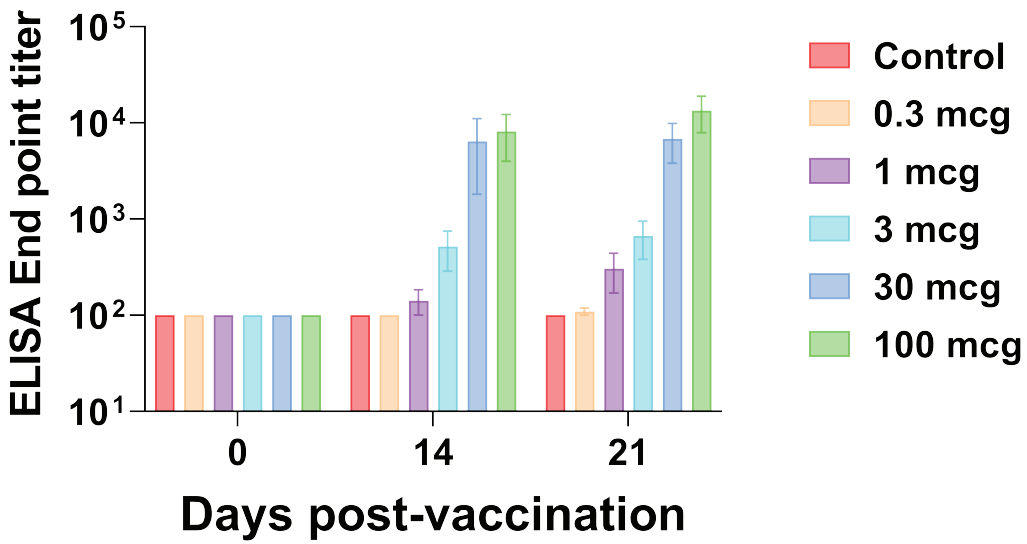

**B**

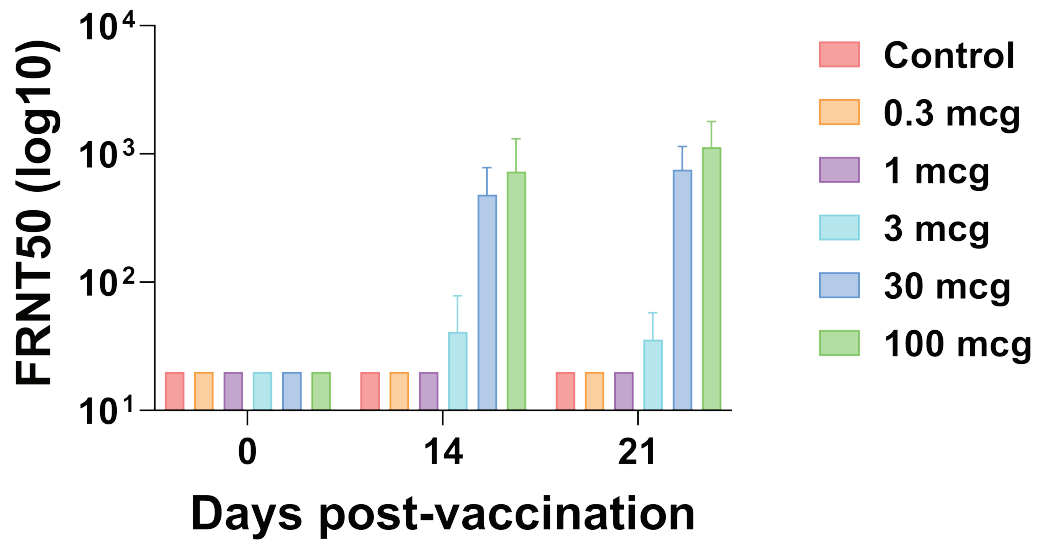

**Supplementary Table 1: The Prentice Criteria**

| <b>Prentice Criteria</b>                                        |                                                                    |                                                                     |
|-----------------------------------------------------------------|--------------------------------------------------------------------|---------------------------------------------------------------------|
| <b>Criteria</b>                                                 | <b>Analysis assessment</b>                                         | <b>Validation requirement</b>                                       |
| 1. Treatment must affect response                               | Logistic regression of mortality on dose                           | Regression must be significant                                      |
| 2. Treatment must affect the candidate surrogate                | Regression of Day 21 titer on dose                                 | Regression must be significant                                      |
| 3. Surrogate must affect the response                           | Logistic regression of mortality on dose                           | Regression must be significant                                      |
| 4. The treatment cannot improve the prediction of the surrogate | Logistic regression of mortality onto both treatment and surrogate | Surrogate must be significant, but treatment must be insignificant. |

**Supplementary Table 2: Plasma Viral RNA**

| Sample        | Group - Dose | Cq    | SQ       | Total copies/mL | Average total copies | Average total copies/mL | log10 Average total copies/mL |               |         |       |          |          |          |          |      |       |          |          |               |         |       |          |          |          |          |      |       |          |          |               |         |       |          |          |          |          |      |       |          |          |               |         |       |          |          |          |          |      |       |          |          |               |         |       |          |          |          |          |      |       |          |          |               |         |       |          |          |          |          |      |       |          |          |               |         |       |          |          |          |          |      |       |          |          |               |         |       |          |          |          |          |      |       |          |          |               |         |       |          |          |          |          |      |       |          |          |               |         |       |          |          |          |          |      |       |          |          |               |        |       |          |          |          |          |      |       |          |          |               |        |       |          |          |          |          |      |       |          |          |               |        |       |          |          |          |          |      |       |          |          |              |      |       |          |          |          |          |      |       |          |          |              |      |       |          |          |          |          |      |       |          |          |              |      |       |          |          |          |          |      |       |          |          |              |      |       |          |          |          |
|---------------|--------------|-------|----------|-----------------|----------------------|-------------------------|-------------------------------|---------------|---------|-------|----------|----------|----------|----------|------|-------|----------|----------|---------------|---------|-------|----------|----------|----------|----------|------|-------|----------|----------|---------------|---------|-------|----------|----------|----------|----------|------|-------|----------|----------|---------------|---------|-------|----------|----------|----------|----------|------|-------|----------|----------|---------------|---------|-------|----------|----------|----------|----------|------|-------|----------|----------|---------------|---------|-------|----------|----------|----------|----------|------|-------|----------|----------|---------------|---------|-------|----------|----------|----------|----------|------|-------|----------|----------|---------------|---------|-------|----------|----------|----------|----------|------|-------|----------|----------|---------------|---------|-------|----------|----------|----------|----------|------|-------|----------|----------|---------------|---------|-------|----------|----------|----------|----------|------|-------|----------|----------|---------------|--------|-------|----------|----------|----------|----------|------|-------|----------|----------|---------------|--------|-------|----------|----------|----------|----------|------|-------|----------|----------|---------------|--------|-------|----------|----------|----------|----------|------|-------|----------|----------|--------------|------|-------|----------|----------|----------|----------|------|-------|----------|----------|--------------|------|-------|----------|----------|----------|----------|------|-------|----------|----------|--------------|------|-------|----------|----------|----------|----------|------|-------|----------|----------|--------------|------|-------|----------|----------|----------|
| NiVCoPCx-2 D4 | Control      | 33.66 | 4.35E+04 | 5.22E+06        | 3.14E+04             | 3.76E+06                | 6.58                          |               |         |       |          |          |          |          |      |       |          |          |               |         |       |          |          |          |          |      |       |          |          |               |         |       |          |          |          |          |      |       |          |          |               |         |       |          |          |          |          |      |       |          |          |               |         |       |          |          |          |          |      |       |          |          |               |         |       |          |          |          |          |      |       |          |          |               |         |       |          |          |          |          |      |       |          |          |               |         |       |          |          |          |          |      |       |          |          |               |         |       |          |          |          |          |      |       |          |          |               |         |       |          |          |          |          |      |       |          |          |               |        |       |          |          |          |          |      |       |          |          |               |        |       |          |          |          |          |      |       |          |          |               |        |       |          |          |          |          |      |       |          |          |              |      |       |          |          |          |          |      |       |          |          |              |      |       |          |          |          |          |      |       |          |          |              |      |       |          |          |          |          |      |       |          |          |              |      |       |          |          |          |
|               |              | 34.89 | 1.93E+04 | 2.31E+06        |                      |                         |                               | NiVCoP03-1 D4 | 0.3 mg  | 34.94 | 3.40E+04 | 4.09E+06 | 2.69E+04 | 3.23E+06 | 6.51 | 35.86 | 1.99E+04 | 2.38E+06 | NiVCoP03-3 D4 | 0.3 mg  | 34.57 | 4.23E+04 | 5.07E+06 | 5.27E+04 | 6.33E+06 | 6.80 | 33.89 | 6.32E+04 | 7.59E+06 | NiVCoP1-4 D4  | 1 mg    | 34.77 | 3.77E+04 | 4.53E+06 | 4.12E+04 | 4.95E+06 | 6.69 | 34.48 | 4.47E+04 | 5.37E+06 | NiVCoPCx-2 D6 | Control | 25.95 | 7.10E+06 | 8.52E+08 | 6.77E+06 | 8.12E+08 | 8.91 | 26.10 | 6.44E+06 | 7.73E+08 | NiVCoP03-1 D6 | 0.3 mg  | 27.05 | 4.00E+06 | 4.80E+08 | 3.86E+06 | 4.63E+08 | 8.67 | 27.18 | 3.72E+06 | 4.46E+08 | NiVCoP03-3 D6 | 0.3 mg  | 28.04 | 2.27E+06 | 2.73E+08 | 2.21E+06 | 2.65E+08 | 8.42 | 28.14 | 2.14E+06 | 2.57E+08 | NiVCoP3-4 D6  | 3 mg    | 26.67 | 4.98E+06 | 5.98E+08 | 4.83E+06 | 5.79E+08 | 8.76 | 26.78 | 4.67E+06 | 5.60E+08 | NiVCoPCx-1 D7 | Control | 28.85 | 1.04E+06 | 1.25E+08 | 9.21E+05 | 1.10E+08 | 8.04 | 29.26 | 7.97E+05 | 9.56E+07 | NiVCoPCx-2 D7 | Control | 28.40 | 1.85E+06 | 2.22E+08 | 1.86E+06 | 2.23E+08 | 8.35 | 28.39 | 1.86E+06 | 2.23E+08 | NiVCoPCx-4 D7 | Control | 26.72 | 4.82E+06 | 5.78E+08 | 4.61E+06 | 5.54E+08 | 8.74 | 26.88 | 4.41E+06 | 5.29E+08 | NiVCoP03-2 D7 | 0.3 mg | 32.28 | 2.02E+05 | 2.42E+07 | 2.34E+05 | 2.80E+07 | 7.45 | 31.80 | 2.65E+05 | 3.18E+07 | NiVCoP03-4 D7 | 0.3 mg | 25.41 | 1.02E+07 | 1.22E+09 | 1.02E+07 | 1.22E+09 | 9.09 | 25.42 | 1.01E+07 | 1.22E+09 | NiVCoP03-5 D7 | 0.3 mg | 28.68 | 1.58E+06 | 1.90E+08 | 1.55E+06 | 1.86E+08 | 8.27 | 28.74 | 1.53E+06 | 1.83E+08 | NiVCoP1-5 D7 | 1 mg | 34.27 | 6.49E+04 | 7.79E+06 | 4.46E+04 | 5.36E+06 | 6.73 | 35.98 | 2.44E+04 | 2.93E+06 | NiVCoP1-1 D7 | 1 mg | 27.48 | 3.13E+06 | 3.76E+08 | 3.09E+06 | 3.71E+08 | 8.57 | 27.52 | 3.06E+06 | 3.67E+08 | NiVCoP1-3 D7 | 1 mg | 26.47 | 5.59E+06 | 6.71E+08 | 5.75E+06 | 6.90E+08 | 8.84 | 26.37 | 5.92E+06 | 7.10E+08 | NiVCoP1-4 D7 | 1 mg | 25.40 | 1.03E+07 | 1.23E+09 | 1.02E+07 |
| NiVCoP03-1 D4 | 0.3 mg       | 34.94 | 3.40E+04 | 4.09E+06        | 2.69E+04             | 3.23E+06                | 6.51                          |               |         |       |          |          |          |          |      |       |          |          |               |         |       |          |          |          |          |      |       |          |          |               |         |       |          |          |          |          |      |       |          |          |               |         |       |          |          |          |          |      |       |          |          |               |         |       |          |          |          |          |      |       |          |          |               |         |       |          |          |          |          |      |       |          |          |               |         |       |          |          |          |          |      |       |          |          |               |         |       |          |          |          |          |      |       |          |          |               |         |       |          |          |          |          |      |       |          |          |               |         |       |          |          |          |          |      |       |          |          |               |        |       |          |          |          |          |      |       |          |          |               |        |       |          |          |          |          |      |       |          |          |               |        |       |          |          |          |          |      |       |          |          |              |      |       |          |          |          |          |      |       |          |          |              |      |       |          |          |          |          |      |       |          |          |              |      |       |          |          |          |          |      |       |          |          |              |      |       |          |          |          |
|               |              | 35.86 | 1.99E+04 | 2.38E+06        |                      |                         |                               | NiVCoP03-3 D4 | 0.3 mg  | 34.57 | 4.23E+04 | 5.07E+06 | 5.27E+04 | 6.33E+06 | 6.80 | 33.89 | 6.32E+04 | 7.59E+06 | NiVCoP1-4 D4  | 1 mg    | 34.77 | 3.77E+04 | 4.53E+06 | 4.12E+04 | 4.95E+06 | 6.69 | 34.48 | 4.47E+04 | 5.37E+06 | NiVCoPCx-2 D6 | Control | 25.95 | 7.10E+06 | 8.52E+08 | 6.77E+06 | 8.12E+08 | 8.91 | 26.10 | 6.44E+06 | 7.73E+08 | NiVCoP03-1 D6 | 0.3 mg  | 27.05 | 4.00E+06 | 4.80E+08 | 3.86E+06 | 4.63E+08 | 8.67 | 27.18 | 3.72E+06 | 4.46E+08 | NiVCoP03-3 D6 | 0.3 mg  | 28.04 | 2.27E+06 | 2.73E+08 | 2.21E+06 | 2.65E+08 | 8.42 | 28.14 | 2.14E+06 | 2.57E+08 | NiVCoP3-4 D6  | 3 mg    | 26.67 | 4.98E+06 | 5.98E+08 | 4.83E+06 | 5.79E+08 | 8.76 | 26.78 | 4.67E+06 | 5.60E+08 | NiVCoPCx-1 D7 | Control | 28.85 | 1.04E+06 | 1.25E+08 | 9.21E+05 | 1.10E+08 | 8.04 | 29.26 | 7.97E+05 | 9.56E+07 | NiVCoPCx-2 D7 | Control | 28.40 | 1.85E+06 | 2.22E+08 | 1.86E+06 | 2.23E+08 | 8.35 | 28.39 | 1.86E+06 | 2.23E+08 | NiVCoPCx-4 D7 | Control | 26.72 | 4.82E+06 | 5.78E+08 | 4.61E+06 | 5.54E+08 | 8.74 | 26.88 | 4.41E+06 | 5.29E+08 | NiVCoP03-2 D7 | 0.3 mg  | 32.28 | 2.02E+05 | 2.42E+07 | 2.34E+05 | 2.80E+07 | 7.45 | 31.80 | 2.65E+05 | 3.18E+07 | NiVCoP03-4 D7 | 0.3 mg | 25.41 | 1.02E+07 | 1.22E+09 | 1.02E+07 | 1.22E+09 | 9.09 | 25.42 | 1.01E+07 | 1.22E+09 | NiVCoP03-5 D7 | 0.3 mg | 28.68 | 1.58E+06 | 1.90E+08 | 1.55E+06 | 1.86E+08 | 8.27 | 28.74 | 1.53E+06 | 1.83E+08 | NiVCoP1-5 D7  | 1 mg   | 34.27 | 6.49E+04 | 7.79E+06 | 4.46E+04 | 5.36E+06 | 6.73 | 35.98 | 2.44E+04 | 2.93E+06 | NiVCoP1-1 D7 | 1 mg | 27.48 | 3.13E+06 | 3.76E+08 | 3.09E+06 | 3.71E+08 | 8.57 | 27.52 | 3.06E+06 | 3.67E+08 | NiVCoP1-3 D7 | 1 mg | 26.47 | 5.59E+06 | 6.71E+08 | 5.75E+06 | 6.90E+08 | 8.84 | 26.37 | 5.92E+06 | 7.10E+08 | NiVCoP1-4 D7 | 1 mg | 25.40 | 1.03E+07 | 1.23E+09 | 1.02E+07 | 1.22E+09 | 9.09 | 25.44 | 1.00E+07 | 1.21E+09 |              |      |       |          |          |          |
| NiVCoP03-3 D4 | 0.3 mg       | 34.57 | 4.23E+04 | 5.07E+06        | 5.27E+04             | 6.33E+06                | 6.80                          |               |         |       |          |          |          |          |      |       |          |          |               |         |       |          |          |          |          |      |       |          |          |               |         |       |          |          |          |          |      |       |          |          |               |         |       |          |          |          |          |      |       |          |          |               |         |       |          |          |          |          |      |       |          |          |               |         |       |          |          |          |          |      |       |          |          |               |         |       |          |          |          |          |      |       |          |          |               |         |       |          |          |          |          |      |       |          |          |               |         |       |          |          |          |          |      |       |          |          |               |         |       |          |          |          |          |      |       |          |          |               |        |       |          |          |          |          |      |       |          |          |               |        |       |          |          |          |          |      |       |          |          |               |        |       |          |          |          |          |      |       |          |          |              |      |       |          |          |          |          |      |       |          |          |              |      |       |          |          |          |          |      |       |          |          |              |      |       |          |          |          |          |      |       |          |          |              |      |       |          |          |          |
|               |              | 33.89 | 6.32E+04 | 7.59E+06        |                      |                         |                               | NiVCoP1-4 D4  | 1 mg    | 34.77 | 3.77E+04 | 4.53E+06 | 4.12E+04 | 4.95E+06 | 6.69 | 34.48 | 4.47E+04 | 5.37E+06 | NiVCoPCx-2 D6 | Control | 25.95 | 7.10E+06 | 8.52E+08 | 6.77E+06 | 8.12E+08 | 8.91 | 26.10 | 6.44E+06 | 7.73E+08 | NiVCoP03-1 D6 | 0.3 mg  | 27.05 | 4.00E+06 | 4.80E+08 | 3.86E+06 | 4.63E+08 | 8.67 | 27.18 | 3.72E+06 | 4.46E+08 | NiVCoP03-3 D6 | 0.3 mg  | 28.04 | 2.27E+06 | 2.73E+08 | 2.21E+06 | 2.65E+08 | 8.42 | 28.14 | 2.14E+06 | 2.57E+08 | NiVCoP3-4 D6  | 3 mg    | 26.67 | 4.98E+06 | 5.98E+08 | 4.83E+06 | 5.79E+08 | 8.76 | 26.78 | 4.67E+06 | 5.60E+08 | NiVCoPCx-1 D7 | Control | 28.85 | 1.04E+06 | 1.25E+08 | 9.21E+05 | 1.10E+08 | 8.04 | 29.26 | 7.97E+05 | 9.56E+07 | NiVCoPCx-2 D7 | Control | 28.40 | 1.85E+06 | 2.22E+08 | 1.86E+06 | 2.23E+08 | 8.35 | 28.39 | 1.86E+06 | 2.23E+08 | NiVCoPCx-4 D7 | Control | 26.72 | 4.82E+06 | 5.78E+08 | 4.61E+06 | 5.54E+08 | 8.74 | 26.88 | 4.41E+06 | 5.29E+08 | NiVCoP03-2 D7 | 0.3 mg  | 32.28 | 2.02E+05 | 2.42E+07 | 2.34E+05 | 2.80E+07 | 7.45 | 31.80 | 2.65E+05 | 3.18E+07 | NiVCoP03-4 D7 | 0.3 mg  | 25.41 | 1.02E+07 | 1.22E+09 | 1.02E+07 | 1.22E+09 | 9.09 | 25.42 | 1.01E+07 | 1.22E+09 | NiVCoP03-5 D7 | 0.3 mg | 28.68 | 1.58E+06 | 1.90E+08 | 1.55E+06 | 1.86E+08 | 8.27 | 28.74 | 1.53E+06 | 1.83E+08 | NiVCoP1-5 D7  | 1 mg   | 34.27 | 6.49E+04 | 7.79E+06 | 4.46E+04 | 5.36E+06 | 6.73 | 35.98 | 2.44E+04 | 2.93E+06 | NiVCoP1-1 D7  | 1 mg   | 27.48 | 3.13E+06 | 3.76E+08 | 3.09E+06 | 3.71E+08 | 8.57 | 27.52 | 3.06E+06 | 3.67E+08 | NiVCoP1-3 D7 | 1 mg | 26.47 | 5.59E+06 | 6.71E+08 | 5.75E+06 | 6.90E+08 | 8.84 | 26.37 | 5.92E+06 | 7.10E+08 | NiVCoP1-4 D7 | 1 mg | 25.40 | 1.03E+07 | 1.23E+09 | 1.02E+07 | 1.22E+09 | 9.09 | 25.44 | 1.00E+07 | 1.21E+09 |              |      |       |          |          |          |          |      |       |          |          |              |      |       |          |          |          |
| NiVCoP1-4 D4  | 1 mg         | 34.77 | 3.77E+04 | 4.53E+06        | 4.12E+04             | 4.95E+06                | 6.69                          |               |         |       |          |          |          |          |      |       |          |          |               |         |       |          |          |          |          |      |       |          |          |               |         |       |          |          |          |          |      |       |          |          |               |         |       |          |          |          |          |      |       |          |          |               |         |       |          |          |          |          |      |       |          |          |               |         |       |          |          |          |          |      |       |          |          |               |         |       |          |          |          |          |      |       |          |          |               |         |       |          |          |          |          |      |       |          |          |               |         |       |          |          |          |          |      |       |          |          |               |         |       |          |          |          |          |      |       |          |          |               |        |       |          |          |          |          |      |       |          |          |               |        |       |          |          |          |          |      |       |          |          |               |        |       |          |          |          |          |      |       |          |          |              |      |       |          |          |          |          |      |       |          |          |              |      |       |          |          |          |          |      |       |          |          |              |      |       |          |          |          |          |      |       |          |          |              |      |       |          |          |          |
|               |              | 34.48 | 4.47E+04 | 5.37E+06        |                      |                         |                               | NiVCoPCx-2 D6 | Control | 25.95 | 7.10E+06 | 8.52E+08 | 6.77E+06 | 8.12E+08 | 8.91 | 26.10 | 6.44E+06 | 7.73E+08 | NiVCoP03-1 D6 | 0.3 mg  | 27.05 | 4.00E+06 | 4.80E+08 | 3.86E+06 | 4.63E+08 | 8.67 | 27.18 | 3.72E+06 | 4.46E+08 | NiVCoP03-3 D6 | 0.3 mg  | 28.04 | 2.27E+06 | 2.73E+08 | 2.21E+06 | 2.65E+08 | 8.42 | 28.14 | 2.14E+06 | 2.57E+08 | NiVCoP3-4 D6  | 3 mg    | 26.67 | 4.98E+06 | 5.98E+08 | 4.83E+06 | 5.79E+08 | 8.76 | 26.78 | 4.67E+06 | 5.60E+08 | NiVCoPCx-1 D7 | Control | 28.85 | 1.04E+06 | 1.25E+08 | 9.21E+05 | 1.10E+08 | 8.04 | 29.26 | 7.97E+05 | 9.56E+07 | NiVCoPCx-2 D7 | Control | 28.40 | 1.85E+06 | 2.22E+08 | 1.86E+06 | 2.23E+08 | 8.35 | 28.39 | 1.86E+06 | 2.23E+08 | NiVCoPCx-4 D7 | Control | 26.72 | 4.82E+06 | 5.78E+08 | 4.61E+06 | 5.54E+08 | 8.74 | 26.88 | 4.41E+06 | 5.29E+08 | NiVCoP03-2 D7 | 0.3 mg  | 32.28 | 2.02E+05 | 2.42E+07 | 2.34E+05 | 2.80E+07 | 7.45 | 31.80 | 2.65E+05 | 3.18E+07 | NiVCoP03-4 D7 | 0.3 mg  | 25.41 | 1.02E+07 | 1.22E+09 | 1.02E+07 | 1.22E+09 | 9.09 | 25.42 | 1.01E+07 | 1.22E+09 | NiVCoP03-5 D7 | 0.3 mg  | 28.68 | 1.58E+06 | 1.90E+08 | 1.55E+06 | 1.86E+08 | 8.27 | 28.74 | 1.53E+06 | 1.83E+08 | NiVCoP1-5 D7  | 1 mg   | 34.27 | 6.49E+04 | 7.79E+06 | 4.46E+04 | 5.36E+06 | 6.73 | 35.98 | 2.44E+04 | 2.93E+06 | NiVCoP1-1 D7  | 1 mg   | 27.48 | 3.13E+06 | 3.76E+08 | 3.09E+06 | 3.71E+08 | 8.57 | 27.52 | 3.06E+06 | 3.67E+08 | NiVCoP1-3 D7  | 1 mg   | 26.47 | 5.59E+06 | 6.71E+08 | 5.75E+06 | 6.90E+08 | 8.84 | 26.37 | 5.92E+06 | 7.10E+08 | NiVCoP1-4 D7 | 1 mg | 25.40 | 1.03E+07 | 1.23E+09 | 1.02E+07 | 1.22E+09 | 9.09 | 25.44 | 1.00E+07 | 1.21E+09 |              |      |       |          |          |          |          |      |       |          |          |              |      |       |          |          |          |          |      |       |          |          |              |      |       |          |          |          |
| NiVCoPCx-2 D6 | Control      | 25.95 | 7.10E+06 | 8.52E+08        | 6.77E+06             | 8.12E+08                | 8.91                          |               |         |       |          |          |          |          |      |       |          |          |               |         |       |          |          |          |          |      |       |          |          |               |         |       |          |          |          |          |      |       |          |          |               |         |       |          |          |          |          |      |       |          |          |               |         |       |          |          |          |          |      |       |          |          |               |         |       |          |          |          |          |      |       |          |          |               |         |       |          |          |          |          |      |       |          |          |               |         |       |          |          |          |          |      |       |          |          |               |         |       |          |          |          |          |      |       |          |          |               |         |       |          |          |          |          |      |       |          |          |               |        |       |          |          |          |          |      |       |          |          |               |        |       |          |          |          |          |      |       |          |          |               |        |       |          |          |          |          |      |       |          |          |              |      |       |          |          |          |          |      |       |          |          |              |      |       |          |          |          |          |      |       |          |          |              |      |       |          |          |          |          |      |       |          |          |              |      |       |          |          |          |
|               |              | 26.10 | 6.44E+06 | 7.73E+08        |                      |                         |                               | NiVCoP03-1 D6 | 0.3 mg  | 27.05 | 4.00E+06 | 4.80E+08 | 3.86E+06 | 4.63E+08 | 8.67 | 27.18 | 3.72E+06 | 4.46E+08 | NiVCoP03-3 D6 | 0.3 mg  | 28.04 | 2.27E+06 | 2.73E+08 | 2.21E+06 | 2.65E+08 | 8.42 | 28.14 | 2.14E+06 | 2.57E+08 | NiVCoP3-4 D6  | 3 mg    | 26.67 | 4.98E+06 | 5.98E+08 | 4.83E+06 | 5.79E+08 | 8.76 | 26.78 | 4.67E+06 | 5.60E+08 | NiVCoPCx-1 D7 | Control | 28.85 | 1.04E+06 | 1.25E+08 | 9.21E+05 | 1.10E+08 | 8.04 | 29.26 | 7.97E+05 | 9.56E+07 | NiVCoPCx-2 D7 | Control | 28.40 | 1.85E+06 | 2.22E+08 | 1.86E+06 | 2.23E+08 | 8.35 | 28.39 | 1.86E+06 | 2.23E+08 | NiVCoPCx-4 D7 | Control | 26.72 | 4.82E+06 | 5.78E+08 | 4.61E+06 | 5.54E+08 | 8.74 | 26.88 | 4.41E+06 | 5.29E+08 | NiVCoP03-2 D7 | 0.3 mg  | 32.28 | 2.02E+05 | 2.42E+07 | 2.34E+05 | 2.80E+07 | 7.45 | 31.80 | 2.65E+05 | 3.18E+07 | NiVCoP03-4 D7 | 0.3 mg  | 25.41 | 1.02E+07 | 1.22E+09 | 1.02E+07 | 1.22E+09 | 9.09 | 25.42 | 1.01E+07 | 1.22E+09 | NiVCoP03-5 D7 | 0.3 mg  | 28.68 | 1.58E+06 | 1.90E+08 | 1.55E+06 | 1.86E+08 | 8.27 | 28.74 | 1.53E+06 | 1.83E+08 | NiVCoP1-5 D7  | 1 mg    | 34.27 | 6.49E+04 | 7.79E+06 | 4.46E+04 | 5.36E+06 | 6.73 | 35.98 | 2.44E+04 | 2.93E+06 | NiVCoP1-1 D7  | 1 mg   | 27.48 | 3.13E+06 | 3.76E+08 | 3.09E+06 | 3.71E+08 | 8.57 | 27.52 | 3.06E+06 | 3.67E+08 | NiVCoP1-3 D7  | 1 mg   | 26.47 | 5.59E+06 | 6.71E+08 | 5.75E+06 | 6.90E+08 | 8.84 | 26.37 | 5.92E+06 | 7.10E+08 | NiVCoP1-4 D7  | 1 mg   | 25.40 | 1.03E+07 | 1.23E+09 | 1.02E+07 | 1.22E+09 | 9.09 | 25.44 | 1.00E+07 | 1.21E+09 |              |      |       |          |          |          |          |      |       |          |          |              |      |       |          |          |          |          |      |       |          |          |              |      |       |          |          |          |          |      |       |          |          |              |      |       |          |          |          |
| NiVCoP03-1 D6 | 0.3 mg       | 27.05 | 4.00E+06 | 4.80E+08        | 3.86E+06             | 4.63E+08                | 8.67                          |               |         |       |          |          |          |          |      |       |          |          |               |         |       |          |          |          |          |      |       |          |          |               |         |       |          |          |          |          |      |       |          |          |               |         |       |          |          |          |          |      |       |          |          |               |         |       |          |          |          |          |      |       |          |          |               |         |       |          |          |          |          |      |       |          |          |               |         |       |          |          |          |          |      |       |          |          |               |         |       |          |          |          |          |      |       |          |          |               |         |       |          |          |          |          |      |       |          |          |               |         |       |          |          |          |          |      |       |          |          |               |        |       |          |          |          |          |      |       |          |          |               |        |       |          |          |          |          |      |       |          |          |               |        |       |          |          |          |          |      |       |          |          |              |      |       |          |          |          |          |      |       |          |          |              |      |       |          |          |          |          |      |       |          |          |              |      |       |          |          |          |          |      |       |          |          |              |      |       |          |          |          |
|               |              | 27.18 | 3.72E+06 | 4.46E+08        |                      |                         |                               | NiVCoP03-3 D6 | 0.3 mg  | 28.04 | 2.27E+06 | 2.73E+08 | 2.21E+06 | 2.65E+08 | 8.42 | 28.14 | 2.14E+06 | 2.57E+08 | NiVCoP3-4 D6  | 3 mg    | 26.67 | 4.98E+06 | 5.98E+08 | 4.83E+06 | 5.79E+08 | 8.76 | 26.78 | 4.67E+06 | 5.60E+08 | NiVCoPCx-1 D7 | Control | 28.85 | 1.04E+06 | 1.25E+08 | 9.21E+05 | 1.10E+08 | 8.04 | 29.26 | 7.97E+05 | 9.56E+07 | NiVCoPCx-2 D7 | Control | 28.40 | 1.85E+06 | 2.22E+08 | 1.86E+06 | 2.23E+08 | 8.35 | 28.39 | 1.86E+06 | 2.23E+08 | NiVCoPCx-4 D7 | Control | 26.72 | 4.82E+06 | 5.78E+08 | 4.61E+06 | 5.54E+08 | 8.74 | 26.88 | 4.41E+06 | 5.29E+08 | NiVCoP03-2 D7 | 0.3 mg  | 32.28 | 2.02E+05 | 2.42E+07 | 2.34E+05 | 2.80E+07 | 7.45 | 31.80 | 2.65E+05 | 3.18E+07 | NiVCoP03-4 D7 | 0.3 mg  | 25.41 | 1.02E+07 | 1.22E+09 | 1.02E+07 | 1.22E+09 | 9.09 | 25.42 | 1.01E+07 | 1.22E+09 | NiVCoP03-5 D7 | 0.3 mg  | 28.68 | 1.58E+06 | 1.90E+08 | 1.55E+06 | 1.86E+08 | 8.27 | 28.74 | 1.53E+06 | 1.83E+08 | NiVCoP1-5 D7  | 1 mg    | 34.27 | 6.49E+04 | 7.79E+06 | 4.46E+04 | 5.36E+06 | 6.73 | 35.98 | 2.44E+04 | 2.93E+06 | NiVCoP1-1 D7  | 1 mg    | 27.48 | 3.13E+06 | 3.76E+08 | 3.09E+06 | 3.71E+08 | 8.57 | 27.52 | 3.06E+06 | 3.67E+08 | NiVCoP1-3 D7  | 1 mg   | 26.47 | 5.59E+06 | 6.71E+08 | 5.75E+06 | 6.90E+08 | 8.84 | 26.37 | 5.92E+06 | 7.10E+08 | NiVCoP1-4 D7  | 1 mg   | 25.40 | 1.03E+07 | 1.23E+09 | 1.02E+07 | 1.22E+09 | 9.09 | 25.44 | 1.00E+07 | 1.21E+09 |               |        |       |          |          |          |          |      |       |          |          |              |      |       |          |          |          |          |      |       |          |          |              |      |       |          |          |          |          |      |       |          |          |              |      |       |          |          |          |          |      |       |          |          |              |      |       |          |          |          |
| NiVCoP03-3 D6 | 0.3 mg       | 28.04 | 2.27E+06 | 2.73E+08        | 2.21E+06             | 2.65E+08                | 8.42                          |               |         |       |          |          |          |          |      |       |          |          |               |         |       |          |          |          |          |      |       |          |          |               |         |       |          |          |          |          |      |       |          |          |               |         |       |          |          |          |          |      |       |          |          |               |         |       |          |          |          |          |      |       |          |          |               |         |       |          |          |          |          |      |       |          |          |               |         |       |          |          |          |          |      |       |          |          |               |         |       |          |          |          |          |      |       |          |          |               |         |       |          |          |          |          |      |       |          |          |               |         |       |          |          |          |          |      |       |          |          |               |        |       |          |          |          |          |      |       |          |          |               |        |       |          |          |          |          |      |       |          |          |               |        |       |          |          |          |          |      |       |          |          |              |      |       |          |          |          |          |      |       |          |          |              |      |       |          |          |          |          |      |       |          |          |              |      |       |          |          |          |          |      |       |          |          |              |      |       |          |          |          |
|               |              | 28.14 | 2.14E+06 | 2.57E+08        |                      |                         |                               | NiVCoP3-4 D6  | 3 mg    | 26.67 | 4.98E+06 | 5.98E+08 | 4.83E+06 | 5.79E+08 | 8.76 | 26.78 | 4.67E+06 | 5.60E+08 | NiVCoPCx-1 D7 | Control | 28.85 | 1.04E+06 | 1.25E+08 | 9.21E+05 | 1.10E+08 | 8.04 | 29.26 | 7.97E+05 | 9.56E+07 | NiVCoPCx-2 D7 | Control | 28.40 | 1.85E+06 | 2.22E+08 | 1.86E+06 | 2.23E+08 | 8.35 | 28.39 | 1.86E+06 | 2.23E+08 | NiVCoPCx-4 D7 | Control | 26.72 | 4.82E+06 | 5.78E+08 | 4.61E+06 | 5.54E+08 | 8.74 | 26.88 | 4.41E+06 | 5.29E+08 | NiVCoP03-2 D7 | 0.3 mg  | 32.28 | 2.02E+05 | 2.42E+07 | 2.34E+05 | 2.80E+07 | 7.45 | 31.80 | 2.65E+05 | 3.18E+07 | NiVCoP03-4 D7 | 0.3 mg  | 25.41 | 1.02E+07 | 1.22E+09 | 1.02E+07 | 1.22E+09 | 9.09 | 25.42 | 1.01E+07 | 1.22E+09 | NiVCoP03-5 D7 | 0.3 mg  | 28.68 | 1.58E+06 | 1.90E+08 | 1.55E+06 | 1.86E+08 | 8.27 | 28.74 | 1.53E+06 | 1.83E+08 | NiVCoP1-5 D7  | 1 mg    | 34.27 | 6.49E+04 | 7.79E+06 | 4.46E+04 | 5.36E+06 | 6.73 | 35.98 | 2.44E+04 | 2.93E+06 | NiVCoP1-1 D7  | 1 mg    | 27.48 | 3.13E+06 | 3.76E+08 | 3.09E+06 | 3.71E+08 | 8.57 | 27.52 | 3.06E+06 | 3.67E+08 | NiVCoP1-3 D7  | 1 mg    | 26.47 | 5.59E+06 | 6.71E+08 | 5.75E+06 | 6.90E+08 | 8.84 | 26.37 | 5.92E+06 | 7.10E+08 | NiVCoP1-4 D7  | 1 mg   | 25.40 | 1.03E+07 | 1.23E+09 | 1.02E+07 | 1.22E+09 | 9.09 | 25.44 | 1.00E+07 | 1.21E+09 |               |        |       |          |          |          |          |      |       |          |          |               |        |       |          |          |          |          |      |       |          |          |              |      |       |          |          |          |          |      |       |          |          |              |      |       |          |          |          |          |      |       |          |          |              |      |       |          |          |          |          |      |       |          |          |              |      |       |          |          |          |
| NiVCoP3-4 D6  | 3 mg         | 26.67 | 4.98E+06 | 5.98E+08        | 4.83E+06             | 5.79E+08                | 8.76                          |               |         |       |          |          |          |          |      |       |          |          |               |         |       |          |          |          |          |      |       |          |          |               |         |       |          |          |          |          |      |       |          |          |               |         |       |          |          |          |          |      |       |          |          |               |         |       |          |          |          |          |      |       |          |          |               |         |       |          |          |          |          |      |       |          |          |               |         |       |          |          |          |          |      |       |          |          |               |         |       |          |          |          |          |      |       |          |          |               |         |       |          |          |          |          |      |       |          |          |               |         |       |          |          |          |          |      |       |          |          |               |        |       |          |          |          |          |      |       |          |          |               |        |       |          |          |          |          |      |       |          |          |               |        |       |          |          |          |          |      |       |          |          |              |      |       |          |          |          |          |      |       |          |          |              |      |       |          |          |          |          |      |       |          |          |              |      |       |          |          |          |          |      |       |          |          |              |      |       |          |          |          |
|               |              | 26.78 | 4.67E+06 | 5.60E+08        |                      |                         |                               | NiVCoPCx-1 D7 | Control | 28.85 | 1.04E+06 | 1.25E+08 | 9.21E+05 | 1.10E+08 | 8.04 | 29.26 | 7.97E+05 | 9.56E+07 | NiVCoPCx-2 D7 | Control | 28.40 | 1.85E+06 | 2.22E+08 | 1.86E+06 | 2.23E+08 | 8.35 | 28.39 | 1.86E+06 | 2.23E+08 | NiVCoPCx-4 D7 | Control | 26.72 | 4.82E+06 | 5.78E+08 | 4.61E+06 | 5.54E+08 | 8.74 | 26.88 | 4.41E+06 | 5.29E+08 | NiVCoP03-2 D7 | 0.3 mg  | 32.28 | 2.02E+05 | 2.42E+07 | 2.34E+05 | 2.80E+07 | 7.45 | 31.80 | 2.65E+05 | 3.18E+07 | NiVCoP03-4 D7 | 0.3 mg  | 25.41 | 1.02E+07 | 1.22E+09 | 1.02E+07 | 1.22E+09 | 9.09 | 25.42 | 1.01E+07 | 1.22E+09 | NiVCoP03-5 D7 | 0.3 mg  | 28.68 | 1.58E+06 | 1.90E+08 | 1.55E+06 | 1.86E+08 | 8.27 | 28.74 | 1.53E+06 | 1.83E+08 | NiVCoP1-5 D7  | 1 mg    | 34.27 | 6.49E+04 | 7.79E+06 | 4.46E+04 | 5.36E+06 | 6.73 | 35.98 | 2.44E+04 | 2.93E+06 | NiVCoP1-1 D7  | 1 mg    | 27.48 | 3.13E+06 | 3.76E+08 | 3.09E+06 | 3.71E+08 | 8.57 | 27.52 | 3.06E+06 | 3.67E+08 | NiVCoP1-3 D7  | 1 mg    | 26.47 | 5.59E+06 | 6.71E+08 | 5.75E+06 | 6.90E+08 | 8.84 | 26.37 | 5.92E+06 | 7.10E+08 | NiVCoP1-4 D7  | 1 mg    | 25.40 | 1.03E+07 | 1.23E+09 | 1.02E+07 | 1.22E+09 | 9.09 | 25.44 | 1.00E+07 | 1.21E+09 |               |        |       |          |          |          |          |      |       |          |          |               |        |       |          |          |          |          |      |       |          |          |               |        |       |          |          |          |          |      |       |          |          |              |      |       |          |          |          |          |      |       |          |          |              |      |       |          |          |          |          |      |       |          |          |              |      |       |          |          |          |          |      |       |          |          |              |      |       |          |          |          |
| NiVCoPCx-1 D7 | Control      | 28.85 | 1.04E+06 | 1.25E+08        | 9.21E+05             | 1.10E+08                | 8.04                          |               |         |       |          |          |          |          |      |       |          |          |               |         |       |          |          |          |          |      |       |          |          |               |         |       |          |          |          |          |      |       |          |          |               |         |       |          |          |          |          |      |       |          |          |               |         |       |          |          |          |          |      |       |          |          |               |         |       |          |          |          |          |      |       |          |          |               |         |       |          |          |          |          |      |       |          |          |               |         |       |          |          |          |          |      |       |          |          |               |         |       |          |          |          |          |      |       |          |          |               |         |       |          |          |          |          |      |       |          |          |               |        |       |          |          |          |          |      |       |          |          |               |        |       |          |          |          |          |      |       |          |          |               |        |       |          |          |          |          |      |       |          |          |              |      |       |          |          |          |          |      |       |          |          |              |      |       |          |          |          |          |      |       |          |          |              |      |       |          |          |          |          |      |       |          |          |              |      |       |          |          |          |
|               |              | 29.26 | 7.97E+05 | 9.56E+07        |                      |                         |                               | NiVCoPCx-2 D7 | Control | 28.40 | 1.85E+06 | 2.22E+08 | 1.86E+06 | 2.23E+08 | 8.35 | 28.39 | 1.86E+06 | 2.23E+08 | NiVCoPCx-4 D7 | Control | 26.72 | 4.82E+06 | 5.78E+08 | 4.61E+06 | 5.54E+08 | 8.74 | 26.88 | 4.41E+06 | 5.29E+08 | NiVCoP03-2 D7 | 0.3 mg  | 32.28 | 2.02E+05 | 2.42E+07 | 2.34E+05 | 2.80E+07 | 7.45 | 31.80 | 2.65E+05 | 3.18E+07 | NiVCoP03-4 D7 | 0.3 mg  | 25.41 | 1.02E+07 | 1.22E+09 | 1.02E+07 | 1.22E+09 | 9.09 | 25.42 | 1.01E+07 | 1.22E+09 | NiVCoP03-5 D7 | 0.3 mg  | 28.68 | 1.58E+06 | 1.90E+08 | 1.55E+06 | 1.86E+08 | 8.27 | 28.74 | 1.53E+06 | 1.83E+08 | NiVCoP1-5 D7  | 1 mg    | 34.27 | 6.49E+04 | 7.79E+06 | 4.46E+04 | 5.36E+06 | 6.73 | 35.98 | 2.44E+04 | 2.93E+06 | NiVCoP1-1 D7  | 1 mg    | 27.48 | 3.13E+06 | 3.76E+08 | 3.09E+06 | 3.71E+08 | 8.57 | 27.52 | 3.06E+06 | 3.67E+08 | NiVCoP1-3 D7  | 1 mg    | 26.47 | 5.59E+06 | 6.71E+08 | 5.75E+06 | 6.90E+08 | 8.84 | 26.37 | 5.92E+06 | 7.10E+08 | NiVCoP1-4 D7  | 1 mg    | 25.40 | 1.03E+07 | 1.23E+09 | 1.02E+07 | 1.22E+09 | 9.09 | 25.44 | 1.00E+07 | 1.21E+09 |               |         |       |          |          |          |          |      |       |          |          |               |        |       |          |          |          |          |      |       |          |          |               |        |       |          |          |          |          |      |       |          |          |               |        |       |          |          |          |          |      |       |          |          |              |      |       |          |          |          |          |      |       |          |          |              |      |       |          |          |          |          |      |       |          |          |              |      |       |          |          |          |          |      |       |          |          |              |      |       |          |          |          |
| NiVCoPCx-2 D7 | Control      | 28.40 | 1.85E+06 | 2.22E+08        | 1.86E+06             | 2.23E+08                | 8.35                          |               |         |       |          |          |          |          |      |       |          |          |               |         |       |          |          |          |          |      |       |          |          |               |         |       |          |          |          |          |      |       |          |          |               |         |       |          |          |          |          |      |       |          |          |               |         |       |          |          |          |          |      |       |          |          |               |         |       |          |          |          |          |      |       |          |          |               |         |       |          |          |          |          |      |       |          |          |               |         |       |          |          |          |          |      |       |          |          |               |         |       |          |          |          |          |      |       |          |          |               |         |       |          |          |          |          |      |       |          |          |               |        |       |          |          |          |          |      |       |          |          |               |        |       |          |          |          |          |      |       |          |          |               |        |       |          |          |          |          |      |       |          |          |              |      |       |          |          |          |          |      |       |          |          |              |      |       |          |          |          |          |      |       |          |          |              |      |       |          |          |          |          |      |       |          |          |              |      |       |          |          |          |
|               |              | 28.39 | 1.86E+06 | 2.23E+08        |                      |                         |                               | NiVCoPCx-4 D7 | Control | 26.72 | 4.82E+06 | 5.78E+08 | 4.61E+06 | 5.54E+08 | 8.74 | 26.88 | 4.41E+06 | 5.29E+08 | NiVCoP03-2 D7 | 0.3 mg  | 32.28 | 2.02E+05 | 2.42E+07 | 2.34E+05 | 2.80E+07 | 7.45 | 31.80 | 2.65E+05 | 3.18E+07 | NiVCoP03-4 D7 | 0.3 mg  | 25.41 | 1.02E+07 | 1.22E+09 | 1.02E+07 | 1.22E+09 | 9.09 | 25.42 | 1.01E+07 | 1.22E+09 | NiVCoP03-5 D7 | 0.3 mg  | 28.68 | 1.58E+06 | 1.90E+08 | 1.55E+06 | 1.86E+08 | 8.27 | 28.74 | 1.53E+06 | 1.83E+08 | NiVCoP1-5 D7  | 1 mg    | 34.27 | 6.49E+04 | 7.79E+06 | 4.46E+04 | 5.36E+06 | 6.73 | 35.98 | 2.44E+04 | 2.93E+06 | NiVCoP1-1 D7  | 1 mg    | 27.48 | 3.13E+06 | 3.76E+08 | 3.09E+06 | 3.71E+08 | 8.57 | 27.52 | 3.06E+06 | 3.67E+08 | NiVCoP1-3 D7  | 1 mg    | 26.47 | 5.59E+06 | 6.71E+08 | 5.75E+06 | 6.90E+08 | 8.84 | 26.37 | 5.92E+06 | 7.10E+08 | NiVCoP1-4 D7  | 1 mg    | 25.40 | 1.03E+07 | 1.23E+09 | 1.02E+07 | 1.22E+09 | 9.09 | 25.44 | 1.00E+07 | 1.21E+09 |               |         |       |          |          |          |          |      |       |          |          |               |         |       |          |          |          |          |      |       |          |          |               |        |       |          |          |          |          |      |       |          |          |               |        |       |          |          |          |          |      |       |          |          |               |        |       |          |          |          |          |      |       |          |          |              |      |       |          |          |          |          |      |       |          |          |              |      |       |          |          |          |          |      |       |          |          |              |      |       |          |          |          |          |      |       |          |          |              |      |       |          |          |          |
| NiVCoPCx-4 D7 | Control      | 26.72 | 4.82E+06 | 5.78E+08        | 4.61E+06             | 5.54E+08                | 8.74                          |               |         |       |          |          |          |          |      |       |          |          |               |         |       |          |          |          |          |      |       |          |          |               |         |       |          |          |          |          |      |       |          |          |               |         |       |          |          |          |          |      |       |          |          |               |         |       |          |          |          |          |      |       |          |          |               |         |       |          |          |          |          |      |       |          |          |               |         |       |          |          |          |          |      |       |          |          |               |         |       |          |          |          |          |      |       |          |          |               |         |       |          |          |          |          |      |       |          |          |               |         |       |          |          |          |          |      |       |          |          |               |        |       |          |          |          |          |      |       |          |          |               |        |       |          |          |          |          |      |       |          |          |               |        |       |          |          |          |          |      |       |          |          |              |      |       |          |          |          |          |      |       |          |          |              |      |       |          |          |          |          |      |       |          |          |              |      |       |          |          |          |          |      |       |          |          |              |      |       |          |          |          |
|               |              | 26.88 | 4.41E+06 | 5.29E+08        |                      |                         |                               | NiVCoP03-2 D7 | 0.3 mg  | 32.28 | 2.02E+05 | 2.42E+07 | 2.34E+05 | 2.80E+07 | 7.45 | 31.80 | 2.65E+05 | 3.18E+07 | NiVCoP03-4 D7 | 0.3 mg  | 25.41 | 1.02E+07 | 1.22E+09 | 1.02E+07 | 1.22E+09 | 9.09 | 25.42 | 1.01E+07 | 1.22E+09 | NiVCoP03-5 D7 | 0.3 mg  | 28.68 | 1.58E+06 | 1.90E+08 | 1.55E+06 | 1.86E+08 | 8.27 | 28.74 | 1.53E+06 | 1.83E+08 | NiVCoP1-5 D7  | 1 mg    | 34.27 | 6.49E+04 | 7.79E+06 | 4.46E+04 | 5.36E+06 | 6.73 | 35.98 | 2.44E+04 | 2.93E+06 | NiVCoP1-1 D7  | 1 mg    | 27.48 | 3.13E+06 | 3.76E+08 | 3.09E+06 | 3.71E+08 | 8.57 | 27.52 | 3.06E+06 | 3.67E+08 | NiVCoP1-3 D7  | 1 mg    | 26.47 | 5.59E+06 | 6.71E+08 | 5.75E+06 | 6.90E+08 | 8.84 | 26.37 | 5.92E+06 | 7.10E+08 | NiVCoP1-4 D7  | 1 mg    | 25.40 | 1.03E+07 | 1.23E+09 | 1.02E+07 | 1.22E+09 | 9.09 | 25.44 | 1.00E+07 | 1.21E+09 |               |         |       |          |          |          |          |      |       |          |          |               |         |       |          |          |          |          |      |       |          |          |               |         |       |          |          |          |          |      |       |          |          |               |        |       |          |          |          |          |      |       |          |          |               |        |       |          |          |          |          |      |       |          |          |               |        |       |          |          |          |          |      |       |          |          |              |      |       |          |          |          |          |      |       |          |          |              |      |       |          |          |          |          |      |       |          |          |              |      |       |          |          |          |          |      |       |          |          |              |      |       |          |          |          |
| NiVCoP03-2 D7 | 0.3 mg       | 32.28 | 2.02E+05 | 2.42E+07        | 2.34E+05             | 2.80E+07                | 7.45                          |               |         |       |          |          |          |          |      |       |          |          |               |         |       |          |          |          |          |      |       |          |          |               |         |       |          |          |          |          |      |       |          |          |               |         |       |          |          |          |          |      |       |          |          |               |         |       |          |          |          |          |      |       |          |          |               |         |       |          |          |          |          |      |       |          |          |               |         |       |          |          |          |          |      |       |          |          |               |         |       |          |          |          |          |      |       |          |          |               |         |       |          |          |          |          |      |       |          |          |               |         |       |          |          |          |          |      |       |          |          |               |        |       |          |          |          |          |      |       |          |          |               |        |       |          |          |          |          |      |       |          |          |               |        |       |          |          |          |          |      |       |          |          |              |      |       |          |          |          |          |      |       |          |          |              |      |       |          |          |          |          |      |       |          |          |              |      |       |          |          |          |          |      |       |          |          |              |      |       |          |          |          |
|               |              | 31.80 | 2.65E+05 | 3.18E+07        |                      |                         |                               | NiVCoP03-4 D7 | 0.3 mg  | 25.41 | 1.02E+07 | 1.22E+09 | 1.02E+07 | 1.22E+09 | 9.09 | 25.42 | 1.01E+07 | 1.22E+09 | NiVCoP03-5 D7 | 0.3 mg  | 28.68 | 1.58E+06 | 1.90E+08 | 1.55E+06 | 1.86E+08 | 8.27 | 28.74 | 1.53E+06 | 1.83E+08 | NiVCoP1-5 D7  | 1 mg    | 34.27 | 6.49E+04 | 7.79E+06 | 4.46E+04 | 5.36E+06 | 6.73 | 35.98 | 2.44E+04 | 2.93E+06 | NiVCoP1-1 D7  | 1 mg    | 27.48 | 3.13E+06 | 3.76E+08 | 3.09E+06 | 3.71E+08 | 8.57 | 27.52 | 3.06E+06 | 3.67E+08 | NiVCoP1-3 D7  | 1 mg    | 26.47 | 5.59E+06 | 6.71E+08 | 5.75E+06 | 6.90E+08 | 8.84 | 26.37 | 5.92E+06 | 7.10E+08 | NiVCoP1-4 D7  | 1 mg    | 25.40 | 1.03E+07 | 1.23E+09 | 1.02E+07 | 1.22E+09 | 9.09 | 25.44 | 1.00E+07 | 1.21E+09 |               |         |       |          |          |          |          |      |       |          |          |               |         |       |          |          |          |          |      |       |          |          |               |         |       |          |          |          |          |      |       |          |          |               |         |       |          |          |          |          |      |       |          |          |               |        |       |          |          |          |          |      |       |          |          |               |        |       |          |          |          |          |      |       |          |          |               |        |       |          |          |          |          |      |       |          |          |              |      |       |          |          |          |          |      |       |          |          |              |      |       |          |          |          |          |      |       |          |          |              |      |       |          |          |          |          |      |       |          |          |              |      |       |          |          |          |
| NiVCoP03-4 D7 | 0.3 mg       | 25.41 | 1.02E+07 | 1.22E+09        | 1.02E+07             | 1.22E+09                | 9.09                          |               |         |       |          |          |          |          |      |       |          |          |               |         |       |          |          |          |          |      |       |          |          |               |         |       |          |          |          |          |      |       |          |          |               |         |       |          |          |          |          |      |       |          |          |               |         |       |          |          |          |          |      |       |          |          |               |         |       |          |          |          |          |      |       |          |          |               |         |       |          |          |          |          |      |       |          |          |               |         |       |          |          |          |          |      |       |          |          |               |         |       |          |          |          |          |      |       |          |          |               |         |       |          |          |          |          |      |       |          |          |               |        |       |          |          |          |          |      |       |          |          |               |        |       |          |          |          |          |      |       |          |          |               |        |       |          |          |          |          |      |       |          |          |              |      |       |          |          |          |          |      |       |          |          |              |      |       |          |          |          |          |      |       |          |          |              |      |       |          |          |          |          |      |       |          |          |              |      |       |          |          |          |
|               |              | 25.42 | 1.01E+07 | 1.22E+09        |                      |                         |                               | NiVCoP03-5 D7 | 0.3 mg  | 28.68 | 1.58E+06 | 1.90E+08 | 1.55E+06 | 1.86E+08 | 8.27 | 28.74 | 1.53E+06 | 1.83E+08 | NiVCoP1-5 D7  | 1 mg    | 34.27 | 6.49E+04 | 7.79E+06 | 4.46E+04 | 5.36E+06 | 6.73 | 35.98 | 2.44E+04 | 2.93E+06 | NiVCoP1-1 D7  | 1 mg    | 27.48 | 3.13E+06 | 3.76E+08 | 3.09E+06 | 3.71E+08 | 8.57 | 27.52 | 3.06E+06 | 3.67E+08 | NiVCoP1-3 D7  | 1 mg    | 26.47 | 5.59E+06 | 6.71E+08 | 5.75E+06 | 6.90E+08 | 8.84 | 26.37 | 5.92E+06 | 7.10E+08 | NiVCoP1-4 D7  | 1 mg    | 25.40 | 1.03E+07 | 1.23E+09 | 1.02E+07 | 1.22E+09 | 9.09 | 25.44 | 1.00E+07 | 1.21E+09 |               |         |       |          |          |          |          |      |       |          |          |               |         |       |          |          |          |          |      |       |          |          |               |         |       |          |          |          |          |      |       |          |          |               |         |       |          |          |          |          |      |       |          |          |               |         |       |          |          |          |          |      |       |          |          |               |        |       |          |          |          |          |      |       |          |          |               |        |       |          |          |          |          |      |       |          |          |               |        |       |          |          |          |          |      |       |          |          |              |      |       |          |          |          |          |      |       |          |          |              |      |       |          |          |          |          |      |       |          |          |              |      |       |          |          |          |          |      |       |          |          |              |      |       |          |          |          |
| NiVCoP03-5 D7 | 0.3 mg       | 28.68 | 1.58E+06 | 1.90E+08        | 1.55E+06             | 1.86E+08                | 8.27                          |               |         |       |          |          |          |          |      |       |          |          |               |         |       |          |          |          |          |      |       |          |          |               |         |       |          |          |          |          |      |       |          |          |               |         |       |          |          |          |          |      |       |          |          |               |         |       |          |          |          |          |      |       |          |          |               |         |       |          |          |          |          |      |       |          |          |               |         |       |          |          |          |          |      |       |          |          |               |         |       |          |          |          |          |      |       |          |          |               |         |       |          |          |          |          |      |       |          |          |               |         |       |          |          |          |          |      |       |          |          |               |        |       |          |          |          |          |      |       |          |          |               |        |       |          |          |          |          |      |       |          |          |               |        |       |          |          |          |          |      |       |          |          |              |      |       |          |          |          |          |      |       |          |          |              |      |       |          |          |          |          |      |       |          |          |              |      |       |          |          |          |          |      |       |          |          |              |      |       |          |          |          |
|               |              | 28.74 | 1.53E+06 | 1.83E+08        |                      |                         |                               | NiVCoP1-5 D7  | 1 mg    | 34.27 | 6.49E+04 | 7.79E+06 | 4.46E+04 | 5.36E+06 | 6.73 | 35.98 | 2.44E+04 | 2.93E+06 | NiVCoP1-1 D7  | 1 mg    | 27.48 | 3.13E+06 | 3.76E+08 | 3.09E+06 | 3.71E+08 | 8.57 | 27.52 | 3.06E+06 | 3.67E+08 | NiVCoP1-3 D7  | 1 mg    | 26.47 | 5.59E+06 | 6.71E+08 | 5.75E+06 | 6.90E+08 | 8.84 | 26.37 | 5.92E+06 | 7.10E+08 | NiVCoP1-4 D7  | 1 mg    | 25.40 | 1.03E+07 | 1.23E+09 | 1.02E+07 | 1.22E+09 | 9.09 | 25.44 | 1.00E+07 | 1.21E+09 |               |         |       |          |          |          |          |      |       |          |          |               |         |       |          |          |          |          |      |       |          |          |               |         |       |          |          |          |          |      |       |          |          |               |         |       |          |          |          |          |      |       |          |          |               |         |       |          |          |          |          |      |       |          |          |               |         |       |          |          |          |          |      |       |          |          |               |        |       |          |          |          |          |      |       |          |          |               |        |       |          |          |          |          |      |       |          |          |               |        |       |          |          |          |          |      |       |          |          |              |      |       |          |          |          |          |      |       |          |          |              |      |       |          |          |          |          |      |       |          |          |              |      |       |          |          |          |          |      |       |          |          |              |      |       |          |          |          |
| NiVCoP1-5 D7  | 1 mg         | 34.27 | 6.49E+04 | 7.79E+06        | 4.46E+04             | 5.36E+06                | 6.73                          |               |         |       |          |          |          |          |      |       |          |          |               |         |       |          |          |          |          |      |       |          |          |               |         |       |          |          |          |          |      |       |          |          |               |         |       |          |          |          |          |      |       |          |          |               |         |       |          |          |          |          |      |       |          |          |               |         |       |          |          |          |          |      |       |          |          |               |         |       |          |          |          |          |      |       |          |          |               |         |       |          |          |          |          |      |       |          |          |               |         |       |          |          |          |          |      |       |          |          |               |         |       |          |          |          |          |      |       |          |          |               |        |       |          |          |          |          |      |       |          |          |               |        |       |          |          |          |          |      |       |          |          |               |        |       |          |          |          |          |      |       |          |          |              |      |       |          |          |          |          |      |       |          |          |              |      |       |          |          |          |          |      |       |          |          |              |      |       |          |          |          |          |      |       |          |          |              |      |       |          |          |          |
|               |              | 35.98 | 2.44E+04 | 2.93E+06        |                      |                         |                               | NiVCoP1-1 D7  | 1 mg    | 27.48 | 3.13E+06 | 3.76E+08 | 3.09E+06 | 3.71E+08 | 8.57 | 27.52 | 3.06E+06 | 3.67E+08 | NiVCoP1-3 D7  | 1 mg    | 26.47 | 5.59E+06 | 6.71E+08 | 5.75E+06 | 6.90E+08 | 8.84 | 26.37 | 5.92E+06 | 7.10E+08 | NiVCoP1-4 D7  | 1 mg    | 25.40 | 1.03E+07 | 1.23E+09 | 1.02E+07 | 1.22E+09 | 9.09 | 25.44 | 1.00E+07 | 1.21E+09 |               |         |       |          |          |          |          |      |       |          |          |               |         |       |          |          |          |          |      |       |          |          |               |         |       |          |          |          |          |      |       |          |          |               |         |       |          |          |          |          |      |       |          |          |               |         |       |          |          |          |          |      |       |          |          |               |         |       |          |          |          |          |      |       |          |          |               |         |       |          |          |          |          |      |       |          |          |               |        |       |          |          |          |          |      |       |          |          |               |        |       |          |          |          |          |      |       |          |          |               |        |       |          |          |          |          |      |       |          |          |              |      |       |          |          |          |          |      |       |          |          |              |      |       |          |          |          |          |      |       |          |          |              |      |       |          |          |          |          |      |       |          |          |              |      |       |          |          |          |
| NiVCoP1-1 D7  | 1 mg         | 27.48 | 3.13E+06 | 3.76E+08        | 3.09E+06             | 3.71E+08                | 8.57                          |               |         |       |          |          |          |          |      |       |          |          |               |         |       |          |          |          |          |      |       |          |          |               |         |       |          |          |          |          |      |       |          |          |               |         |       |          |          |          |          |      |       |          |          |               |         |       |          |          |          |          |      |       |          |          |               |         |       |          |          |          |          |      |       |          |          |               |         |       |          |          |          |          |      |       |          |          |               |         |       |          |          |          |          |      |       |          |          |               |         |       |          |          |          |          |      |       |          |          |               |         |       |          |          |          |          |      |       |          |          |               |        |       |          |          |          |          |      |       |          |          |               |        |       |          |          |          |          |      |       |          |          |               |        |       |          |          |          |          |      |       |          |          |              |      |       |          |          |          |          |      |       |          |          |              |      |       |          |          |          |          |      |       |          |          |              |      |       |          |          |          |          |      |       |          |          |              |      |       |          |          |          |
|               |              | 27.52 | 3.06E+06 | 3.67E+08        |                      |                         |                               | NiVCoP1-3 D7  | 1 mg    | 26.47 | 5.59E+06 | 6.71E+08 | 5.75E+06 | 6.90E+08 | 8.84 | 26.37 | 5.92E+06 | 7.10E+08 | NiVCoP1-4 D7  | 1 mg    | 25.40 | 1.03E+07 | 1.23E+09 | 1.02E+07 | 1.22E+09 | 9.09 | 25.44 | 1.00E+07 | 1.21E+09 |               |         |       |          |          |          |          |      |       |          |          |               |         |       |          |          |          |          |      |       |          |          |               |         |       |          |          |          |          |      |       |          |          |               |         |       |          |          |          |          |      |       |          |          |               |         |       |          |          |          |          |      |       |          |          |               |         |       |          |          |          |          |      |       |          |          |               |         |       |          |          |          |          |      |       |          |          |               |         |       |          |          |          |          |      |       |          |          |               |        |       |          |          |          |          |      |       |          |          |               |        |       |          |          |          |          |      |       |          |          |               |        |       |          |          |          |          |      |       |          |          |              |      |       |          |          |          |          |      |       |          |          |              |      |       |          |          |          |          |      |       |          |          |              |      |       |          |          |          |          |      |       |          |          |              |      |       |          |          |          |
| NiVCoP1-3 D7  | 1 mg         | 26.47 | 5.59E+06 | 6.71E+08        | 5.75E+06             | 6.90E+08                | 8.84                          |               |         |       |          |          |          |          |      |       |          |          |               |         |       |          |          |          |          |      |       |          |          |               |         |       |          |          |          |          |      |       |          |          |               |         |       |          |          |          |          |      |       |          |          |               |         |       |          |          |          |          |      |       |          |          |               |         |       |          |          |          |          |      |       |          |          |               |         |       |          |          |          |          |      |       |          |          |               |         |       |          |          |          |          |      |       |          |          |               |         |       |          |          |          |          |      |       |          |          |               |         |       |          |          |          |          |      |       |          |          |               |        |       |          |          |          |          |      |       |          |          |               |        |       |          |          |          |          |      |       |          |          |               |        |       |          |          |          |          |      |       |          |          |              |      |       |          |          |          |          |      |       |          |          |              |      |       |          |          |          |          |      |       |          |          |              |      |       |          |          |          |          |      |       |          |          |              |      |       |          |          |          |
|               |              | 26.37 | 5.92E+06 | 7.10E+08        |                      |                         |                               | NiVCoP1-4 D7  | 1 mg    | 25.40 | 1.03E+07 | 1.23E+09 | 1.02E+07 | 1.22E+09 | 9.09 | 25.44 | 1.00E+07 | 1.21E+09 |               |         |       |          |          |          |          |      |       |          |          |               |         |       |          |          |          |          |      |       |          |          |               |         |       |          |          |          |          |      |       |          |          |               |         |       |          |          |          |          |      |       |          |          |               |         |       |          |          |          |          |      |       |          |          |               |         |       |          |          |          |          |      |       |          |          |               |         |       |          |          |          |          |      |       |          |          |               |         |       |          |          |          |          |      |       |          |          |               |         |       |          |          |          |          |      |       |          |          |               |        |       |          |          |          |          |      |       |          |          |               |        |       |          |          |          |          |      |       |          |          |               |        |       |          |          |          |          |      |       |          |          |              |      |       |          |          |          |          |      |       |          |          |              |      |       |          |          |          |          |      |       |          |          |              |      |       |          |          |          |          |      |       |          |          |              |      |       |          |          |          |
| NiVCoP1-4 D7  | 1 mg         | 25.40 | 1.03E+07 | 1.23E+09        | 1.02E+07             | 1.22E+09                | 9.09                          |               |         |       |          |          |          |          |      |       |          |          |               |         |       |          |          |          |          |      |       |          |          |               |         |       |          |          |          |          |      |       |          |          |               |         |       |          |          |          |          |      |       |          |          |               |         |       |          |          |          |          |      |       |          |          |               |         |       |          |          |          |          |      |       |          |          |               |         |       |          |          |          |          |      |       |          |          |               |         |       |          |          |          |          |      |       |          |          |               |         |       |          |          |          |          |      |       |          |          |               |         |       |          |          |          |          |      |       |          |          |               |        |       |          |          |          |          |      |       |          |          |               |        |       |          |          |          |          |      |       |          |          |               |        |       |          |          |          |          |      |       |          |          |              |      |       |          |          |          |          |      |       |          |          |              |      |       |          |          |          |          |      |       |          |          |              |      |       |          |          |          |          |      |       |          |          |              |      |       |          |          |          |
|               |              | 25.44 | 1.00E+07 | 1.21E+09        |                      |                         |                               |               |         |       |          |          |          |          |      |       |          |          |               |         |       |          |          |          |          |      |       |          |          |               |         |       |          |          |          |          |      |       |          |          |               |         |       |          |          |          |          |      |       |          |          |               |         |       |          |          |          |          |      |       |          |          |               |         |       |          |          |          |          |      |       |          |          |               |         |       |          |          |          |          |      |       |          |          |               |         |       |          |          |          |          |      |       |          |          |               |         |       |          |          |          |          |      |       |          |          |               |         |       |          |          |          |          |      |       |          |          |               |        |       |          |          |          |          |      |       |          |          |               |        |       |          |          |          |          |      |       |          |          |               |        |       |          |          |          |          |      |       |          |          |              |      |       |          |          |          |          |      |       |          |          |              |      |       |          |          |          |          |      |       |          |          |              |      |       |          |          |          |          |      |       |          |          |              |      |       |          |          |          |

|                    |         |       |          |          |          |          |      |                    |         |       |          |          |          |          |      |       |          |          |                    |         |       |          |          |          |          |      |       |          |          |                    |         |       |          |          |          |          |      |       |          |          |                    |         |       |          |          |          |          |      |       |          |          |                    |         |       |          |          |          |          |      |       |          |          |                    |         |       |          |          |          |          |      |       |          |          |                    |         |       |          |          |          |          |      |       |          |          |                    |        |       |          |          |          |          |      |       |          |          |                    |        |       |          |          |          |          |      |       |          |          |                    |        |       |          |          |          |          |      |       |          |          |                    |        |       |          |          |          |          |      |       |          |          |                    |        |       |          |          |          |          |      |       |          |          |                    |        |       |          |          |          |          |      |       |          |          |                    |        |       |          |          |          |
|--------------------|---------|-------|----------|----------|----------|----------|------|--------------------|---------|-------|----------|----------|----------|----------|------|-------|----------|----------|--------------------|---------|-------|----------|----------|----------|----------|------|-------|----------|----------|--------------------|---------|-------|----------|----------|----------|----------|------|-------|----------|----------|--------------------|---------|-------|----------|----------|----------|----------|------|-------|----------|----------|--------------------|---------|-------|----------|----------|----------|----------|------|-------|----------|----------|--------------------|---------|-------|----------|----------|----------|----------|------|-------|----------|----------|--------------------|---------|-------|----------|----------|----------|----------|------|-------|----------|----------|--------------------|--------|-------|----------|----------|----------|----------|------|-------|----------|----------|--------------------|--------|-------|----------|----------|----------|----------|------|-------|----------|----------|--------------------|--------|-------|----------|----------|----------|----------|------|-------|----------|----------|--------------------|--------|-------|----------|----------|----------|----------|------|-------|----------|----------|--------------------|--------|-------|----------|----------|----------|----------|------|-------|----------|----------|--------------------|--------|-------|----------|----------|----------|----------|------|-------|----------|----------|--------------------|--------|-------|----------|----------|----------|
| NiVCoP1-2<br>D7    | 1 mg    | 26.06 | 7.05E+06 | 8.46E+08 | 6.78E+06 | 8.13E+08 | 8.91 |                    |         |       |          |          |          |          |      |       |          |          |                    |         |       |          |          |          |          |      |       |          |          |                    |         |       |          |          |          |          |      |       |          |          |                    |         |       |          |          |          |          |      |       |          |          |                    |         |       |          |          |          |          |      |       |          |          |                    |         |       |          |          |          |          |      |       |          |          |                    |         |       |          |          |          |          |      |       |          |          |                    |        |       |          |          |          |          |      |       |          |          |                    |        |       |          |          |          |          |      |       |          |          |                    |        |       |          |          |          |          |      |       |          |          |                    |        |       |          |          |          |          |      |       |          |          |                    |        |       |          |          |          |          |      |       |          |          |                    |        |       |          |          |          |          |      |       |          |          |                    |        |       |          |          |          |
|                    |         | 26.20 | 6.51E+06 | 7.81E+08 |          |          |      | NiVCoP3-3<br>D7    | 3 mg    | 33.24 | 1.17E+05 | 1.40E+07 | 1.07E+05 | 1.28E+07 | 7.11 | 33.56 | 9.70E+04 | 1.16E+07 | NiVCoP3-5<br>D7    | 3 mg    | 27.69 | 2.77E+06 | 3.33E+08 | 2.54E+06 | 3.05E+08 | 8.48 | 28.01 | 2.31E+06 | 2.77E+08 | NiVCoP3-6<br>D7    | 3 mg    | 30.70 | 4.99E+05 | 5.98E+07 | 4.77E+05 | 5.72E+07 | 7.76 | 30.86 | 4.55E+05 | 5.46E+07 | NiVCoP30-2<br>D7   | 30 mg   | 32.92 | 7.11E+04 | 8.53E+06 | 8.88E+04 | 1.07E+07 | 7.03 | 32.30 | 1.07E+05 | 1.28E+07 | NiVCoP100-2<br>D7  | 100 mg  | 31.69 | 1.60E+05 | 1.92E+07 | 1.83E+05 | 2.19E+07 | 7.34 | 31.31 | 2.05E+05 | 2.46E+07 | NiVCoPCx-1<br>D8   | Control | 27.21 | 1.51E+06 | 1.81E+08 | 1.65E+06 | 1.98E+08 | 8.30 | 26.97 | 1.79E+06 | 2.15E+08 | NiVCoPCx-3<br>D8   | Control | 25.42 | 1.01E+07 | 1.22E+09 | 1.03E+07 | 1.23E+09 | 9.09 | 25.37 | 1.04E+07 | 1.25E+09 | NiVCoP03-2<br>D8   | 0.3 mg | 29.02 | 1.30E+06 | 1.56E+08 | 1.27E+06 | 1.53E+08 | 8.18 | 29.09 | 1.25E+06 | 1.50E+08 | NiVCoP03-5<br>D8   | 0.3 mg | 26.78 | 4.68E+06 | 5.61E+08 | 4.83E+06 | 5.80E+08 | 8.76 | 26.67 | 4.99E+06 | 5.98E+08 | NiVCoP1-5<br>D8    | 1 mg   | 28.70 | 1.56E+06 | 1.87E+08 | 1.72E+06 | 2.06E+08 | 8.31 | 28.38 | 1.88E+06 | 2.25E+08 | NiVCoP1-3<br>D8    | 1 mg   | 26.21 | 6.47E+06 | 7.77E+08 | 6.43E+06 | 7.71E+08 | 8.89 | 26.23 | 6.38E+06 | 7.66E+08 | NiVCoP3-3<br>D9    | 3 mg   | 30.30 | 6.26E+05 | 7.51E+07 | 6.26E+05 | 7.52E+07 | 7.88 | 30.30 | 6.27E+05 | 7.53E+07 | NiVCoP3-5<br>D9    | 3 mg   | 27.56 | 2.99E+06 | 3.59E+08 | 2.76E+06 | 3.32E+08 | 8.52 | 27.85 | 2.54E+06 | 3.05E+08 | NiVCoP100-2<br>D10 | 100 mg | 29.29 | 3.37E+05 | 4.05E+07 | 3.34E+05 |
| NiVCoP3-3<br>D7    | 3 mg    | 33.24 | 1.17E+05 | 1.40E+07 | 1.07E+05 | 1.28E+07 | 7.11 |                    |         |       |          |          |          |          |      |       |          |          |                    |         |       |          |          |          |          |      |       |          |          |                    |         |       |          |          |          |          |      |       |          |          |                    |         |       |          |          |          |          |      |       |          |          |                    |         |       |          |          |          |          |      |       |          |          |                    |         |       |          |          |          |          |      |       |          |          |                    |         |       |          |          |          |          |      |       |          |          |                    |        |       |          |          |          |          |      |       |          |          |                    |        |       |          |          |          |          |      |       |          |          |                    |        |       |          |          |          |          |      |       |          |          |                    |        |       |          |          |          |          |      |       |          |          |                    |        |       |          |          |          |          |      |       |          |          |                    |        |       |          |          |          |          |      |       |          |          |                    |        |       |          |          |          |
|                    |         | 33.56 | 9.70E+04 | 1.16E+07 |          |          |      | NiVCoP3-5<br>D7    | 3 mg    | 27.69 | 2.77E+06 | 3.33E+08 | 2.54E+06 | 3.05E+08 | 8.48 | 28.01 | 2.31E+06 | 2.77E+08 | NiVCoP3-6<br>D7    | 3 mg    | 30.70 | 4.99E+05 | 5.98E+07 | 4.77E+05 | 5.72E+07 | 7.76 | 30.86 | 4.55E+05 | 5.46E+07 | NiVCoP30-2<br>D7   | 30 mg   | 32.92 | 7.11E+04 | 8.53E+06 | 8.88E+04 | 1.07E+07 | 7.03 | 32.30 | 1.07E+05 | 1.28E+07 | NiVCoP100-2<br>D7  | 100 mg  | 31.69 | 1.60E+05 | 1.92E+07 | 1.83E+05 | 2.19E+07 | 7.34 | 31.31 | 2.05E+05 | 2.46E+07 | NiVCoPCx-1<br>D8   | Control | 27.21 | 1.51E+06 | 1.81E+08 | 1.65E+06 | 1.98E+08 | 8.30 | 26.97 | 1.79E+06 | 2.15E+08 | NiVCoPCx-3<br>D8   | Control | 25.42 | 1.01E+07 | 1.22E+09 | 1.03E+07 | 1.23E+09 | 9.09 | 25.37 | 1.04E+07 | 1.25E+09 | NiVCoP03-2<br>D8   | 0.3 mg  | 29.02 | 1.30E+06 | 1.56E+08 | 1.27E+06 | 1.53E+08 | 8.18 | 29.09 | 1.25E+06 | 1.50E+08 | NiVCoP03-5<br>D8   | 0.3 mg | 26.78 | 4.68E+06 | 5.61E+08 | 4.83E+06 | 5.80E+08 | 8.76 | 26.67 | 4.99E+06 | 5.98E+08 | NiVCoP1-5<br>D8    | 1 mg   | 28.70 | 1.56E+06 | 1.87E+08 | 1.72E+06 | 2.06E+08 | 8.31 | 28.38 | 1.88E+06 | 2.25E+08 | NiVCoP1-3<br>D8    | 1 mg   | 26.21 | 6.47E+06 | 7.77E+08 | 6.43E+06 | 7.71E+08 | 8.89 | 26.23 | 6.38E+06 | 7.66E+08 | NiVCoP3-3<br>D9    | 3 mg   | 30.30 | 6.26E+05 | 7.51E+07 | 6.26E+05 | 7.52E+07 | 7.88 | 30.30 | 6.27E+05 | 7.53E+07 | NiVCoP3-5<br>D9    | 3 mg   | 27.56 | 2.99E+06 | 3.59E+08 | 2.76E+06 | 3.32E+08 | 8.52 | 27.85 | 2.54E+06 | 3.05E+08 | NiVCoP100-2<br>D10 | 100 mg | 29.29 | 3.37E+05 | 4.05E+07 | 3.34E+05 | 4.00E+07 | 7.60 | 29.33 | 3.30E+05 | 3.96E+07 |                    |        |       |          |          |          |
| NiVCoP3-5<br>D7    | 3 mg    | 27.69 | 2.77E+06 | 3.33E+08 | 2.54E+06 | 3.05E+08 | 8.48 |                    |         |       |          |          |          |          |      |       |          |          |                    |         |       |          |          |          |          |      |       |          |          |                    |         |       |          |          |          |          |      |       |          |          |                    |         |       |          |          |          |          |      |       |          |          |                    |         |       |          |          |          |          |      |       |          |          |                    |         |       |          |          |          |          |      |       |          |          |                    |         |       |          |          |          |          |      |       |          |          |                    |        |       |          |          |          |          |      |       |          |          |                    |        |       |          |          |          |          |      |       |          |          |                    |        |       |          |          |          |          |      |       |          |          |                    |        |       |          |          |          |          |      |       |          |          |                    |        |       |          |          |          |          |      |       |          |          |                    |        |       |          |          |          |          |      |       |          |          |                    |        |       |          |          |          |
|                    |         | 28.01 | 2.31E+06 | 2.77E+08 |          |          |      | NiVCoP3-6<br>D7    | 3 mg    | 30.70 | 4.99E+05 | 5.98E+07 | 4.77E+05 | 5.72E+07 | 7.76 | 30.86 | 4.55E+05 | 5.46E+07 | NiVCoP30-2<br>D7   | 30 mg   | 32.92 | 7.11E+04 | 8.53E+06 | 8.88E+04 | 1.07E+07 | 7.03 | 32.30 | 1.07E+05 | 1.28E+07 | NiVCoP100-2<br>D7  | 100 mg  | 31.69 | 1.60E+05 | 1.92E+07 | 1.83E+05 | 2.19E+07 | 7.34 | 31.31 | 2.05E+05 | 2.46E+07 | NiVCoPCx-1<br>D8   | Control | 27.21 | 1.51E+06 | 1.81E+08 | 1.65E+06 | 1.98E+08 | 8.30 | 26.97 | 1.79E+06 | 2.15E+08 | NiVCoPCx-3<br>D8   | Control | 25.42 | 1.01E+07 | 1.22E+09 | 1.03E+07 | 1.23E+09 | 9.09 | 25.37 | 1.04E+07 | 1.25E+09 | NiVCoP03-2<br>D8   | 0.3 mg  | 29.02 | 1.30E+06 | 1.56E+08 | 1.27E+06 | 1.53E+08 | 8.18 | 29.09 | 1.25E+06 | 1.50E+08 | NiVCoP03-5<br>D8   | 0.3 mg  | 26.78 | 4.68E+06 | 5.61E+08 | 4.83E+06 | 5.80E+08 | 8.76 | 26.67 | 4.99E+06 | 5.98E+08 | NiVCoP1-5<br>D8    | 1 mg   | 28.70 | 1.56E+06 | 1.87E+08 | 1.72E+06 | 2.06E+08 | 8.31 | 28.38 | 1.88E+06 | 2.25E+08 | NiVCoP1-3<br>D8    | 1 mg   | 26.21 | 6.47E+06 | 7.77E+08 | 6.43E+06 | 7.71E+08 | 8.89 | 26.23 | 6.38E+06 | 7.66E+08 | NiVCoP3-3<br>D9    | 3 mg   | 30.30 | 6.26E+05 | 7.51E+07 | 6.26E+05 | 7.52E+07 | 7.88 | 30.30 | 6.27E+05 | 7.53E+07 | NiVCoP3-5<br>D9    | 3 mg   | 27.56 | 2.99E+06 | 3.59E+08 | 2.76E+06 | 3.32E+08 | 8.52 | 27.85 | 2.54E+06 | 3.05E+08 | NiVCoP100-2<br>D10 | 100 mg | 29.29 | 3.37E+05 | 4.05E+07 | 3.34E+05 | 4.00E+07 | 7.60 | 29.33 | 3.30E+05 | 3.96E+07 |                    |        |       |          |          |          |          |      |       |          |          |                    |        |       |          |          |          |
| NiVCoP3-6<br>D7    | 3 mg    | 30.70 | 4.99E+05 | 5.98E+07 | 4.77E+05 | 5.72E+07 | 7.76 |                    |         |       |          |          |          |          |      |       |          |          |                    |         |       |          |          |          |          |      |       |          |          |                    |         |       |          |          |          |          |      |       |          |          |                    |         |       |          |          |          |          |      |       |          |          |                    |         |       |          |          |          |          |      |       |          |          |                    |         |       |          |          |          |          |      |       |          |          |                    |         |       |          |          |          |          |      |       |          |          |                    |        |       |          |          |          |          |      |       |          |          |                    |        |       |          |          |          |          |      |       |          |          |                    |        |       |          |          |          |          |      |       |          |          |                    |        |       |          |          |          |          |      |       |          |          |                    |        |       |          |          |          |          |      |       |          |          |                    |        |       |          |          |          |          |      |       |          |          |                    |        |       |          |          |          |
|                    |         | 30.86 | 4.55E+05 | 5.46E+07 |          |          |      | NiVCoP30-2<br>D7   | 30 mg   | 32.92 | 7.11E+04 | 8.53E+06 | 8.88E+04 | 1.07E+07 | 7.03 | 32.30 | 1.07E+05 | 1.28E+07 | NiVCoP100-2<br>D7  | 100 mg  | 31.69 | 1.60E+05 | 1.92E+07 | 1.83E+05 | 2.19E+07 | 7.34 | 31.31 | 2.05E+05 | 2.46E+07 | NiVCoPCx-1<br>D8   | Control | 27.21 | 1.51E+06 | 1.81E+08 | 1.65E+06 | 1.98E+08 | 8.30 | 26.97 | 1.79E+06 | 2.15E+08 | NiVCoPCx-3<br>D8   | Control | 25.42 | 1.01E+07 | 1.22E+09 | 1.03E+07 | 1.23E+09 | 9.09 | 25.37 | 1.04E+07 | 1.25E+09 | NiVCoP03-2<br>D8   | 0.3 mg  | 29.02 | 1.30E+06 | 1.56E+08 | 1.27E+06 | 1.53E+08 | 8.18 | 29.09 | 1.25E+06 | 1.50E+08 | NiVCoP03-5<br>D8   | 0.3 mg  | 26.78 | 4.68E+06 | 5.61E+08 | 4.83E+06 | 5.80E+08 | 8.76 | 26.67 | 4.99E+06 | 5.98E+08 | NiVCoP1-5<br>D8    | 1 mg    | 28.70 | 1.56E+06 | 1.87E+08 | 1.72E+06 | 2.06E+08 | 8.31 | 28.38 | 1.88E+06 | 2.25E+08 | NiVCoP1-3<br>D8    | 1 mg   | 26.21 | 6.47E+06 | 7.77E+08 | 6.43E+06 | 7.71E+08 | 8.89 | 26.23 | 6.38E+06 | 7.66E+08 | NiVCoP3-3<br>D9    | 3 mg   | 30.30 | 6.26E+05 | 7.51E+07 | 6.26E+05 | 7.52E+07 | 7.88 | 30.30 | 6.27E+05 | 7.53E+07 | NiVCoP3-5<br>D9    | 3 mg   | 27.56 | 2.99E+06 | 3.59E+08 | 2.76E+06 | 3.32E+08 | 8.52 | 27.85 | 2.54E+06 | 3.05E+08 | NiVCoP100-2<br>D10 | 100 mg | 29.29 | 3.37E+05 | 4.05E+07 | 3.34E+05 | 4.00E+07 | 7.60 | 29.33 | 3.30E+05 | 3.96E+07 |                    |        |       |          |          |          |          |      |       |          |          |                    |        |       |          |          |          |          |      |       |          |          |                    |        |       |          |          |          |
| NiVCoP30-2<br>D7   | 30 mg   | 32.92 | 7.11E+04 | 8.53E+06 | 8.88E+04 | 1.07E+07 | 7.03 |                    |         |       |          |          |          |          |      |       |          |          |                    |         |       |          |          |          |          |      |       |          |          |                    |         |       |          |          |          |          |      |       |          |          |                    |         |       |          |          |          |          |      |       |          |          |                    |         |       |          |          |          |          |      |       |          |          |                    |         |       |          |          |          |          |      |       |          |          |                    |         |       |          |          |          |          |      |       |          |          |                    |        |       |          |          |          |          |      |       |          |          |                    |        |       |          |          |          |          |      |       |          |          |                    |        |       |          |          |          |          |      |       |          |          |                    |        |       |          |          |          |          |      |       |          |          |                    |        |       |          |          |          |          |      |       |          |          |                    |        |       |          |          |          |          |      |       |          |          |                    |        |       |          |          |          |
|                    |         | 32.30 | 1.07E+05 | 1.28E+07 |          |          |      | NiVCoP100-2<br>D7  | 100 mg  | 31.69 | 1.60E+05 | 1.92E+07 | 1.83E+05 | 2.19E+07 | 7.34 | 31.31 | 2.05E+05 | 2.46E+07 | NiVCoPCx-1<br>D8   | Control | 27.21 | 1.51E+06 | 1.81E+08 | 1.65E+06 | 1.98E+08 | 8.30 | 26.97 | 1.79E+06 | 2.15E+08 | NiVCoPCx-3<br>D8   | Control | 25.42 | 1.01E+07 | 1.22E+09 | 1.03E+07 | 1.23E+09 | 9.09 | 25.37 | 1.04E+07 | 1.25E+09 | NiVCoP03-2<br>D8   | 0.3 mg  | 29.02 | 1.30E+06 | 1.56E+08 | 1.27E+06 | 1.53E+08 | 8.18 | 29.09 | 1.25E+06 | 1.50E+08 | NiVCoP03-5<br>D8   | 0.3 mg  | 26.78 | 4.68E+06 | 5.61E+08 | 4.83E+06 | 5.80E+08 | 8.76 | 26.67 | 4.99E+06 | 5.98E+08 | NiVCoP1-5<br>D8    | 1 mg    | 28.70 | 1.56E+06 | 1.87E+08 | 1.72E+06 | 2.06E+08 | 8.31 | 28.38 | 1.88E+06 | 2.25E+08 | NiVCoP1-3<br>D8    | 1 mg    | 26.21 | 6.47E+06 | 7.77E+08 | 6.43E+06 | 7.71E+08 | 8.89 | 26.23 | 6.38E+06 | 7.66E+08 | NiVCoP3-3<br>D9    | 3 mg   | 30.30 | 6.26E+05 | 7.51E+07 | 6.26E+05 | 7.52E+07 | 7.88 | 30.30 | 6.27E+05 | 7.53E+07 | NiVCoP3-5<br>D9    | 3 mg   | 27.56 | 2.99E+06 | 3.59E+08 | 2.76E+06 | 3.32E+08 | 8.52 | 27.85 | 2.54E+06 | 3.05E+08 | NiVCoP100-2<br>D10 | 100 mg | 29.29 | 3.37E+05 | 4.05E+07 | 3.34E+05 | 4.00E+07 | 7.60 | 29.33 | 3.30E+05 | 3.96E+07 |                    |        |       |          |          |          |          |      |       |          |          |                    |        |       |          |          |          |          |      |       |          |          |                    |        |       |          |          |          |          |      |       |          |          |                    |        |       |          |          |          |
| NiVCoP100-2<br>D7  | 100 mg  | 31.69 | 1.60E+05 | 1.92E+07 | 1.83E+05 | 2.19E+07 | 7.34 |                    |         |       |          |          |          |          |      |       |          |          |                    |         |       |          |          |          |          |      |       |          |          |                    |         |       |          |          |          |          |      |       |          |          |                    |         |       |          |          |          |          |      |       |          |          |                    |         |       |          |          |          |          |      |       |          |          |                    |         |       |          |          |          |          |      |       |          |          |                    |         |       |          |          |          |          |      |       |          |          |                    |        |       |          |          |          |          |      |       |          |          |                    |        |       |          |          |          |          |      |       |          |          |                    |        |       |          |          |          |          |      |       |          |          |                    |        |       |          |          |          |          |      |       |          |          |                    |        |       |          |          |          |          |      |       |          |          |                    |        |       |          |          |          |          |      |       |          |          |                    |        |       |          |          |          |
|                    |         | 31.31 | 2.05E+05 | 2.46E+07 |          |          |      | NiVCoPCx-1<br>D8   | Control | 27.21 | 1.51E+06 | 1.81E+08 | 1.65E+06 | 1.98E+08 | 8.30 | 26.97 | 1.79E+06 | 2.15E+08 | NiVCoPCx-3<br>D8   | Control | 25.42 | 1.01E+07 | 1.22E+09 | 1.03E+07 | 1.23E+09 | 9.09 | 25.37 | 1.04E+07 | 1.25E+09 | NiVCoP03-2<br>D8   | 0.3 mg  | 29.02 | 1.30E+06 | 1.56E+08 | 1.27E+06 | 1.53E+08 | 8.18 | 29.09 | 1.25E+06 | 1.50E+08 | NiVCoP03-5<br>D8   | 0.3 mg  | 26.78 | 4.68E+06 | 5.61E+08 | 4.83E+06 | 5.80E+08 | 8.76 | 26.67 | 4.99E+06 | 5.98E+08 | NiVCoP1-5<br>D8    | 1 mg    | 28.70 | 1.56E+06 | 1.87E+08 | 1.72E+06 | 2.06E+08 | 8.31 | 28.38 | 1.88E+06 | 2.25E+08 | NiVCoP1-3<br>D8    | 1 mg    | 26.21 | 6.47E+06 | 7.77E+08 | 6.43E+06 | 7.71E+08 | 8.89 | 26.23 | 6.38E+06 | 7.66E+08 | NiVCoP3-3<br>D9    | 3 mg    | 30.30 | 6.26E+05 | 7.51E+07 | 6.26E+05 | 7.52E+07 | 7.88 | 30.30 | 6.27E+05 | 7.53E+07 | NiVCoP3-5<br>D9    | 3 mg   | 27.56 | 2.99E+06 | 3.59E+08 | 2.76E+06 | 3.32E+08 | 8.52 | 27.85 | 2.54E+06 | 3.05E+08 | NiVCoP100-2<br>D10 | 100 mg | 29.29 | 3.37E+05 | 4.05E+07 | 3.34E+05 | 4.00E+07 | 7.60 | 29.33 | 3.30E+05 | 3.96E+07 |                    |        |       |          |          |          |          |      |       |          |          |                    |        |       |          |          |          |          |      |       |          |          |                    |        |       |          |          |          |          |      |       |          |          |                    |        |       |          |          |          |          |      |       |          |          |                    |        |       |          |          |          |
| NiVCoPCx-1<br>D8   | Control | 27.21 | 1.51E+06 | 1.81E+08 | 1.65E+06 | 1.98E+08 | 8.30 |                    |         |       |          |          |          |          |      |       |          |          |                    |         |       |          |          |          |          |      |       |          |          |                    |         |       |          |          |          |          |      |       |          |          |                    |         |       |          |          |          |          |      |       |          |          |                    |         |       |          |          |          |          |      |       |          |          |                    |         |       |          |          |          |          |      |       |          |          |                    |         |       |          |          |          |          |      |       |          |          |                    |        |       |          |          |          |          |      |       |          |          |                    |        |       |          |          |          |          |      |       |          |          |                    |        |       |          |          |          |          |      |       |          |          |                    |        |       |          |          |          |          |      |       |          |          |                    |        |       |          |          |          |          |      |       |          |          |                    |        |       |          |          |          |          |      |       |          |          |                    |        |       |          |          |          |
|                    |         | 26.97 | 1.79E+06 | 2.15E+08 |          |          |      | NiVCoPCx-3<br>D8   | Control | 25.42 | 1.01E+07 | 1.22E+09 | 1.03E+07 | 1.23E+09 | 9.09 | 25.37 | 1.04E+07 | 1.25E+09 | NiVCoP03-2<br>D8   | 0.3 mg  | 29.02 | 1.30E+06 | 1.56E+08 | 1.27E+06 | 1.53E+08 | 8.18 | 29.09 | 1.25E+06 | 1.50E+08 | NiVCoP03-5<br>D8   | 0.3 mg  | 26.78 | 4.68E+06 | 5.61E+08 | 4.83E+06 | 5.80E+08 | 8.76 | 26.67 | 4.99E+06 | 5.98E+08 | NiVCoP1-5<br>D8    | 1 mg    | 28.70 | 1.56E+06 | 1.87E+08 | 1.72E+06 | 2.06E+08 | 8.31 | 28.38 | 1.88E+06 | 2.25E+08 | NiVCoP1-3<br>D8    | 1 mg    | 26.21 | 6.47E+06 | 7.77E+08 | 6.43E+06 | 7.71E+08 | 8.89 | 26.23 | 6.38E+06 | 7.66E+08 | NiVCoP3-3<br>D9    | 3 mg    | 30.30 | 6.26E+05 | 7.51E+07 | 6.26E+05 | 7.52E+07 | 7.88 | 30.30 | 6.27E+05 | 7.53E+07 | NiVCoP3-5<br>D9    | 3 mg    | 27.56 | 2.99E+06 | 3.59E+08 | 2.76E+06 | 3.32E+08 | 8.52 | 27.85 | 2.54E+06 | 3.05E+08 | NiVCoP100-2<br>D10 | 100 mg | 29.29 | 3.37E+05 | 4.05E+07 | 3.34E+05 | 4.00E+07 | 7.60 | 29.33 | 3.30E+05 | 3.96E+07 |                    |        |       |          |          |          |          |      |       |          |          |                    |        |       |          |          |          |          |      |       |          |          |                    |        |       |          |          |          |          |      |       |          |          |                    |        |       |          |          |          |          |      |       |          |          |                    |        |       |          |          |          |          |      |       |          |          |                    |        |       |          |          |          |
| NiVCoPCx-3<br>D8   | Control | 25.42 | 1.01E+07 | 1.22E+09 | 1.03E+07 | 1.23E+09 | 9.09 |                    |         |       |          |          |          |          |      |       |          |          |                    |         |       |          |          |          |          |      |       |          |          |                    |         |       |          |          |          |          |      |       |          |          |                    |         |       |          |          |          |          |      |       |          |          |                    |         |       |          |          |          |          |      |       |          |          |                    |         |       |          |          |          |          |      |       |          |          |                    |         |       |          |          |          |          |      |       |          |          |                    |        |       |          |          |          |          |      |       |          |          |                    |        |       |          |          |          |          |      |       |          |          |                    |        |       |          |          |          |          |      |       |          |          |                    |        |       |          |          |          |          |      |       |          |          |                    |        |       |          |          |          |          |      |       |          |          |                    |        |       |          |          |          |          |      |       |          |          |                    |        |       |          |          |          |
|                    |         | 25.37 | 1.04E+07 | 1.25E+09 |          |          |      | NiVCoP03-2<br>D8   | 0.3 mg  | 29.02 | 1.30E+06 | 1.56E+08 | 1.27E+06 | 1.53E+08 | 8.18 | 29.09 | 1.25E+06 | 1.50E+08 | NiVCoP03-5<br>D8   | 0.3 mg  | 26.78 | 4.68E+06 | 5.61E+08 | 4.83E+06 | 5.80E+08 | 8.76 | 26.67 | 4.99E+06 | 5.98E+08 | NiVCoP1-5<br>D8    | 1 mg    | 28.70 | 1.56E+06 | 1.87E+08 | 1.72E+06 | 2.06E+08 | 8.31 | 28.38 | 1.88E+06 | 2.25E+08 | NiVCoP1-3<br>D8    | 1 mg    | 26.21 | 6.47E+06 | 7.77E+08 | 6.43E+06 | 7.71E+08 | 8.89 | 26.23 | 6.38E+06 | 7.66E+08 | NiVCoP3-3<br>D9    | 3 mg    | 30.30 | 6.26E+05 | 7.51E+07 | 6.26E+05 | 7.52E+07 | 7.88 | 30.30 | 6.27E+05 | 7.53E+07 | NiVCoP3-5<br>D9    | 3 mg    | 27.56 | 2.99E+06 | 3.59E+08 | 2.76E+06 | 3.32E+08 | 8.52 | 27.85 | 2.54E+06 | 3.05E+08 | NiVCoP100-2<br>D10 | 100 mg  | 29.29 | 3.37E+05 | 4.05E+07 | 3.34E+05 | 4.00E+07 | 7.60 | 29.33 | 3.30E+05 | 3.96E+07 |                    |        |       |          |          |          |          |      |       |          |          |                    |        |       |          |          |          |          |      |       |          |          |                    |        |       |          |          |          |          |      |       |          |          |                    |        |       |          |          |          |          |      |       |          |          |                    |        |       |          |          |          |          |      |       |          |          |                    |        |       |          |          |          |          |      |       |          |          |                    |        |       |          |          |          |
| NiVCoP03-2<br>D8   | 0.3 mg  | 29.02 | 1.30E+06 | 1.56E+08 | 1.27E+06 | 1.53E+08 | 8.18 |                    |         |       |          |          |          |          |      |       |          |          |                    |         |       |          |          |          |          |      |       |          |          |                    |         |       |          |          |          |          |      |       |          |          |                    |         |       |          |          |          |          |      |       |          |          |                    |         |       |          |          |          |          |      |       |          |          |                    |         |       |          |          |          |          |      |       |          |          |                    |         |       |          |          |          |          |      |       |          |          |                    |        |       |          |          |          |          |      |       |          |          |                    |        |       |          |          |          |          |      |       |          |          |                    |        |       |          |          |          |          |      |       |          |          |                    |        |       |          |          |          |          |      |       |          |          |                    |        |       |          |          |          |          |      |       |          |          |                    |        |       |          |          |          |          |      |       |          |          |                    |        |       |          |          |          |
|                    |         | 29.09 | 1.25E+06 | 1.50E+08 |          |          |      | NiVCoP03-5<br>D8   | 0.3 mg  | 26.78 | 4.68E+06 | 5.61E+08 | 4.83E+06 | 5.80E+08 | 8.76 | 26.67 | 4.99E+06 | 5.98E+08 | NiVCoP1-5<br>D8    | 1 mg    | 28.70 | 1.56E+06 | 1.87E+08 | 1.72E+06 | 2.06E+08 | 8.31 | 28.38 | 1.88E+06 | 2.25E+08 | NiVCoP1-3<br>D8    | 1 mg    | 26.21 | 6.47E+06 | 7.77E+08 | 6.43E+06 | 7.71E+08 | 8.89 | 26.23 | 6.38E+06 | 7.66E+08 | NiVCoP3-3<br>D9    | 3 mg    | 30.30 | 6.26E+05 | 7.51E+07 | 6.26E+05 | 7.52E+07 | 7.88 | 30.30 | 6.27E+05 | 7.53E+07 | NiVCoP3-5<br>D9    | 3 mg    | 27.56 | 2.99E+06 | 3.59E+08 | 2.76E+06 | 3.32E+08 | 8.52 | 27.85 | 2.54E+06 | 3.05E+08 | NiVCoP100-2<br>D10 | 100 mg  | 29.29 | 3.37E+05 | 4.05E+07 | 3.34E+05 | 4.00E+07 | 7.60 | 29.33 | 3.30E+05 | 3.96E+07 |                    |         |       |          |          |          |          |      |       |          |          |                    |        |       |          |          |          |          |      |       |          |          |                    |        |       |          |          |          |          |      |       |          |          |                    |        |       |          |          |          |          |      |       |          |          |                    |        |       |          |          |          |          |      |       |          |          |                    |        |       |          |          |          |          |      |       |          |          |                    |        |       |          |          |          |          |      |       |          |          |                    |        |       |          |          |          |
| NiVCoP03-5<br>D8   | 0.3 mg  | 26.78 | 4.68E+06 | 5.61E+08 | 4.83E+06 | 5.80E+08 | 8.76 |                    |         |       |          |          |          |          |      |       |          |          |                    |         |       |          |          |          |          |      |       |          |          |                    |         |       |          |          |          |          |      |       |          |          |                    |         |       |          |          |          |          |      |       |          |          |                    |         |       |          |          |          |          |      |       |          |          |                    |         |       |          |          |          |          |      |       |          |          |                    |         |       |          |          |          |          |      |       |          |          |                    |        |       |          |          |          |          |      |       |          |          |                    |        |       |          |          |          |          |      |       |          |          |                    |        |       |          |          |          |          |      |       |          |          |                    |        |       |          |          |          |          |      |       |          |          |                    |        |       |          |          |          |          |      |       |          |          |                    |        |       |          |          |          |          |      |       |          |          |                    |        |       |          |          |          |
|                    |         | 26.67 | 4.99E+06 | 5.98E+08 |          |          |      | NiVCoP1-5<br>D8    | 1 mg    | 28.70 | 1.56E+06 | 1.87E+08 | 1.72E+06 | 2.06E+08 | 8.31 | 28.38 | 1.88E+06 | 2.25E+08 | NiVCoP1-3<br>D8    | 1 mg    | 26.21 | 6.47E+06 | 7.77E+08 | 6.43E+06 | 7.71E+08 | 8.89 | 26.23 | 6.38E+06 | 7.66E+08 | NiVCoP3-3<br>D9    | 3 mg    | 30.30 | 6.26E+05 | 7.51E+07 | 6.26E+05 | 7.52E+07 | 7.88 | 30.30 | 6.27E+05 | 7.53E+07 | NiVCoP3-5<br>D9    | 3 mg    | 27.56 | 2.99E+06 | 3.59E+08 | 2.76E+06 | 3.32E+08 | 8.52 | 27.85 | 2.54E+06 | 3.05E+08 | NiVCoP100-2<br>D10 | 100 mg  | 29.29 | 3.37E+05 | 4.05E+07 | 3.34E+05 | 4.00E+07 | 7.60 | 29.33 | 3.30E+05 | 3.96E+07 |                    |         |       |          |          |          |          |      |       |          |          |                    |         |       |          |          |          |          |      |       |          |          |                    |        |       |          |          |          |          |      |       |          |          |                    |        |       |          |          |          |          |      |       |          |          |                    |        |       |          |          |          |          |      |       |          |          |                    |        |       |          |          |          |          |      |       |          |          |                    |        |       |          |          |          |          |      |       |          |          |                    |        |       |          |          |          |          |      |       |          |          |                    |        |       |          |          |          |
| NiVCoP1-5<br>D8    | 1 mg    | 28.70 | 1.56E+06 | 1.87E+08 | 1.72E+06 | 2.06E+08 | 8.31 |                    |         |       |          |          |          |          |      |       |          |          |                    |         |       |          |          |          |          |      |       |          |          |                    |         |       |          |          |          |          |      |       |          |          |                    |         |       |          |          |          |          |      |       |          |          |                    |         |       |          |          |          |          |      |       |          |          |                    |         |       |          |          |          |          |      |       |          |          |                    |         |       |          |          |          |          |      |       |          |          |                    |        |       |          |          |          |          |      |       |          |          |                    |        |       |          |          |          |          |      |       |          |          |                    |        |       |          |          |          |          |      |       |          |          |                    |        |       |          |          |          |          |      |       |          |          |                    |        |       |          |          |          |          |      |       |          |          |                    |        |       |          |          |          |          |      |       |          |          |                    |        |       |          |          |          |
|                    |         | 28.38 | 1.88E+06 | 2.25E+08 |          |          |      | NiVCoP1-3<br>D8    | 1 mg    | 26.21 | 6.47E+06 | 7.77E+08 | 6.43E+06 | 7.71E+08 | 8.89 | 26.23 | 6.38E+06 | 7.66E+08 | NiVCoP3-3<br>D9    | 3 mg    | 30.30 | 6.26E+05 | 7.51E+07 | 6.26E+05 | 7.52E+07 | 7.88 | 30.30 | 6.27E+05 | 7.53E+07 | NiVCoP3-5<br>D9    | 3 mg    | 27.56 | 2.99E+06 | 3.59E+08 | 2.76E+06 | 3.32E+08 | 8.52 | 27.85 | 2.54E+06 | 3.05E+08 | NiVCoP100-2<br>D10 | 100 mg  | 29.29 | 3.37E+05 | 4.05E+07 | 3.34E+05 | 4.00E+07 | 7.60 | 29.33 | 3.30E+05 | 3.96E+07 |                    |         |       |          |          |          |          |      |       |          |          |                    |         |       |          |          |          |          |      |       |          |          |                    |         |       |          |          |          |          |      |       |          |          |                    |        |       |          |          |          |          |      |       |          |          |                    |        |       |          |          |          |          |      |       |          |          |                    |        |       |          |          |          |          |      |       |          |          |                    |        |       |          |          |          |          |      |       |          |          |                    |        |       |          |          |          |          |      |       |          |          |                    |        |       |          |          |          |          |      |       |          |          |                    |        |       |          |          |          |
| NiVCoP1-3<br>D8    | 1 mg    | 26.21 | 6.47E+06 | 7.77E+08 | 6.43E+06 | 7.71E+08 | 8.89 |                    |         |       |          |          |          |          |      |       |          |          |                    |         |       |          |          |          |          |      |       |          |          |                    |         |       |          |          |          |          |      |       |          |          |                    |         |       |          |          |          |          |      |       |          |          |                    |         |       |          |          |          |          |      |       |          |          |                    |         |       |          |          |          |          |      |       |          |          |                    |         |       |          |          |          |          |      |       |          |          |                    |        |       |          |          |          |          |      |       |          |          |                    |        |       |          |          |          |          |      |       |          |          |                    |        |       |          |          |          |          |      |       |          |          |                    |        |       |          |          |          |          |      |       |          |          |                    |        |       |          |          |          |          |      |       |          |          |                    |        |       |          |          |          |          |      |       |          |          |                    |        |       |          |          |          |
|                    |         | 26.23 | 6.38E+06 | 7.66E+08 |          |          |      | NiVCoP3-3<br>D9    | 3 mg    | 30.30 | 6.26E+05 | 7.51E+07 | 6.26E+05 | 7.52E+07 | 7.88 | 30.30 | 6.27E+05 | 7.53E+07 | NiVCoP3-5<br>D9    | 3 mg    | 27.56 | 2.99E+06 | 3.59E+08 | 2.76E+06 | 3.32E+08 | 8.52 | 27.85 | 2.54E+06 | 3.05E+08 | NiVCoP100-2<br>D10 | 100 mg  | 29.29 | 3.37E+05 | 4.05E+07 | 3.34E+05 | 4.00E+07 | 7.60 | 29.33 | 3.30E+05 | 3.96E+07 |                    |         |       |          |          |          |          |      |       |          |          |                    |         |       |          |          |          |          |      |       |          |          |                    |         |       |          |          |          |          |      |       |          |          |                    |         |       |          |          |          |          |      |       |          |          |                    |        |       |          |          |          |          |      |       |          |          |                    |        |       |          |          |          |          |      |       |          |          |                    |        |       |          |          |          |          |      |       |          |          |                    |        |       |          |          |          |          |      |       |          |          |                    |        |       |          |          |          |          |      |       |          |          |                    |        |       |          |          |          |          |      |       |          |          |                    |        |       |          |          |          |
| NiVCoP3-3<br>D9    | 3 mg    | 30.30 | 6.26E+05 | 7.51E+07 | 6.26E+05 | 7.52E+07 | 7.88 |                    |         |       |          |          |          |          |      |       |          |          |                    |         |       |          |          |          |          |      |       |          |          |                    |         |       |          |          |          |          |      |       |          |          |                    |         |       |          |          |          |          |      |       |          |          |                    |         |       |          |          |          |          |      |       |          |          |                    |         |       |          |          |          |          |      |       |          |          |                    |         |       |          |          |          |          |      |       |          |          |                    |        |       |          |          |          |          |      |       |          |          |                    |        |       |          |          |          |          |      |       |          |          |                    |        |       |          |          |          |          |      |       |          |          |                    |        |       |          |          |          |          |      |       |          |          |                    |        |       |          |          |          |          |      |       |          |          |                    |        |       |          |          |          |          |      |       |          |          |                    |        |       |          |          |          |
|                    |         | 30.30 | 6.27E+05 | 7.53E+07 |          |          |      | NiVCoP3-5<br>D9    | 3 mg    | 27.56 | 2.99E+06 | 3.59E+08 | 2.76E+06 | 3.32E+08 | 8.52 | 27.85 | 2.54E+06 | 3.05E+08 | NiVCoP100-2<br>D10 | 100 mg  | 29.29 | 3.37E+05 | 4.05E+07 | 3.34E+05 | 4.00E+07 | 7.60 | 29.33 | 3.30E+05 | 3.96E+07 |                    |         |       |          |          |          |          |      |       |          |          |                    |         |       |          |          |          |          |      |       |          |          |                    |         |       |          |          |          |          |      |       |          |          |                    |         |       |          |          |          |          |      |       |          |          |                    |         |       |          |          |          |          |      |       |          |          |                    |        |       |          |          |          |          |      |       |          |          |                    |        |       |          |          |          |          |      |       |          |          |                    |        |       |          |          |          |          |      |       |          |          |                    |        |       |          |          |          |          |      |       |          |          |                    |        |       |          |          |          |          |      |       |          |          |                    |        |       |          |          |          |          |      |       |          |          |                    |        |       |          |          |          |
| NiVCoP3-5<br>D9    | 3 mg    | 27.56 | 2.99E+06 | 3.59E+08 | 2.76E+06 | 3.32E+08 | 8.52 |                    |         |       |          |          |          |          |      |       |          |          |                    |         |       |          |          |          |          |      |       |          |          |                    |         |       |          |          |          |          |      |       |          |          |                    |         |       |          |          |          |          |      |       |          |          |                    |         |       |          |          |          |          |      |       |          |          |                    |         |       |          |          |          |          |      |       |          |          |                    |         |       |          |          |          |          |      |       |          |          |                    |        |       |          |          |          |          |      |       |          |          |                    |        |       |          |          |          |          |      |       |          |          |                    |        |       |          |          |          |          |      |       |          |          |                    |        |       |          |          |          |          |      |       |          |          |                    |        |       |          |          |          |          |      |       |          |          |                    |        |       |          |          |          |          |      |       |          |          |                    |        |       |          |          |          |
|                    |         | 27.85 | 2.54E+06 | 3.05E+08 |          |          |      | NiVCoP100-2<br>D10 | 100 mg  | 29.29 | 3.37E+05 | 4.05E+07 | 3.34E+05 | 4.00E+07 | 7.60 | 29.33 | 3.30E+05 | 3.96E+07 |                    |         |       |          |          |          |          |      |       |          |          |                    |         |       |          |          |          |          |      |       |          |          |                    |         |       |          |          |          |          |      |       |          |          |                    |         |       |          |          |          |          |      |       |          |          |                    |         |       |          |          |          |          |      |       |          |          |                    |         |       |          |          |          |          |      |       |          |          |                    |        |       |          |          |          |          |      |       |          |          |                    |        |       |          |          |          |          |      |       |          |          |                    |        |       |          |          |          |          |      |       |          |          |                    |        |       |          |          |          |          |      |       |          |          |                    |        |       |          |          |          |          |      |       |          |          |                    |        |       |          |          |          |          |      |       |          |          |                    |        |       |          |          |          |
| NiVCoP100-2<br>D10 | 100 mg  | 29.29 | 3.37E+05 | 4.05E+07 | 3.34E+05 | 4.00E+07 | 7.60 |                    |         |       |          |          |          |          |      |       |          |          |                    |         |       |          |          |          |          |      |       |          |          |                    |         |       |          |          |          |          |      |       |          |          |                    |         |       |          |          |          |          |      |       |          |          |                    |         |       |          |          |          |          |      |       |          |          |                    |         |       |          |          |          |          |      |       |          |          |                    |         |       |          |          |          |          |      |       |          |          |                    |        |       |          |          |          |          |      |       |          |          |                    |        |       |          |          |          |          |      |       |          |          |                    |        |       |          |          |          |          |      |       |          |          |                    |        |       |          |          |          |          |      |       |          |          |                    |        |       |          |          |          |          |      |       |          |          |                    |        |       |          |          |          |          |      |       |          |          |                    |        |       |          |          |          |
|                    |         | 29.33 | 3.30E+05 | 3.96E+07 |          |          |      |                    |         |       |          |          |          |          |      |       |          |          |                    |         |       |          |          |          |          |      |       |          |          |                    |         |       |          |          |          |          |      |       |          |          |                    |         |       |          |          |          |          |      |       |          |          |                    |         |       |          |          |          |          |      |       |          |          |                    |         |       |          |          |          |          |      |       |          |          |                    |         |       |          |          |          |          |      |       |          |          |                    |        |       |          |          |          |          |      |       |          |          |                    |        |       |          |          |          |          |      |       |          |          |                    |        |       |          |          |          |          |      |       |          |          |                    |        |       |          |          |          |          |      |       |          |          |                    |        |       |          |          |          |          |      |       |          |          |                    |        |       |          |          |          |          |      |       |          |          |                    |        |       |          |          |          |
